# Supplementary material for: Investigation of gene-by-sex interactions for lipid traits in diverse populations from the population architecture using genomics and epidemiology study
Source: PubMed Central journal article supplement (PMC3669109; doi:10.1186/1471-2156-14-33), 2013-05-01

Supplementary Materials

Supplementary Table 1. Mean lipid levels by sex and cohort in the PAGE studies.

| Study | Racial/ethnic group or population* | HDL<br>mean (SD*) in mg/dL |             | LDL<br>mean (SD) in mg/dL |              | ln(TG)<br>mean (SD) in mg/dL |             |
|-------|------------------------------------|----------------------------|-------------|---------------------------|--------------|------------------------------|-------------|
|       |                                    | Males                      | Females     | Males                     | Females      | Males                        | Females     |
| EAGLE | EA                                 | 45.2 (12.5)                | 56.5 (16.4) | 126.6 (35.3)              | 127.1 (36.8) | 4.88 (0.54)                  | 4.80 (0.53) |
|       | AA                                 | 51.5 (16.0)                | 56.1 (17.2) | 123.1 (38.1)              | 121.6 (39.3) | 4.57 (0.53)                  | 4.50 (0.48) |
|       | MA/H                               | 44.9 (12.3)                | 51.7 (13.4) | 125.0 (34.2)              | 117.0 (32.4) | 4.89 (0.58)                  | 4.88 (0.53) |
| MEC   | EA                                 | 49.7 (13.1)                | 64.3 (16.8) | 112.3 (31.9)              | 126.0 (34.5) | 4.65 (0.52)                  | 4.81 (0.47) |
|       | AA                                 | 51.5 (13.8)                | 64.2 (15.1) | 123.9 (44.0)              | 126.1 (39.3) | 4.63 (0.46)                  | 4.56 (0.44) |
|       | MA/H                               | 48.4 (11.5)                | 56.0 (14.5) | 118.1 (36.4)              | 128.9 (37.5) | 4.95 (0.50)                  | 5.09 (0.43) |
| WHI   | EA                                 | --                         | 58.3 (15.5) | --                        | 132.2 (34.5) | --                           | 4.98 (0.45) |
|       | AA                                 | --                         | 57.4 (15.1) | --                        | 134.1 (39.2) | --                           | 4.70 (0.40) |
|       | AI                                 | --                         | 53.1 (13.7) | --                        | 126.1 (37.8) | --                           | 4.96 (0.49) |
|       | MA/H                               | --                         | 53.9 (14.5) | --                        | 127.6 (35.0) | --                           | 5.04 (0.45) |

|        |                      |             |             |              |              |             |             |
|--------|----------------------|-------------|-------------|--------------|--------------|-------------|-------------|
| ARIC   | EA                   | 42.6 (12.4) | 57.4 (17.0) | 140.1 (35.5) | 135.5 (39.5) | 4.86 (0.52) | 4.73 (0.50) |
|        | AA                   | 50.4 (16.8) | 58.2 (17.4) | 137.8 (41.9) | 138.0 (44.0) | 4.63 (0.50) | 4.58 (0.44) |
| CARDIA | EA                   | 47.2 (11.0) | 56.3 (13.0) | 111.8 (30.9) | 105.7 (28.7) | 4.32 (0.54) | 4.14 (0.46) |
|        | AA                   | 53.4 (13.4) | 55.1 (12.7) | 108.8 (32.5) | 111.7 (31.3) | 4.11 (0.48) | 4.05 (0.43) |
| CHS    | EA                   | 46.0 (11.0) | 57.3 (14.4) | 121.6 (31.7) | 130.8 (33.9) | 4.84 (0.50) | 4.91 (0.48) |
|        | AA                   | 51.9 (13.4) | 60.7 (14.9) | 122.1 (32.8) | 133.8 (37.7) | 4.62 (0.47) | 4.65 (0.42) |
| SHS    | AI – Arizona         | 43.2 (14.0) | 45.3 (11.3) | 97.8 (29.3)  | 99.3 (29.5)  | 4.80 (0.56) | 4.86 (0.52) |
|        | AI – South<br>Dakota | 43.9 (14.2) | 48.7 (14.2) | 116.6 (32.4) | 114.6 (32.2) | 4.71 (0.66) | 4.79 (0.57) |
|        | AI –<br>Oklahoma     | 41.9 (12.2) | 49.4 (13.7) | 113.8 (31.4) | 109.7 (30.9) | 4.85 (0.52) | 4.81 (0.55) |

---

\*Abbreviations: EA = European American; AA= African American; MA/H = Mexican American/Hispanic; AI = American

Indian; SD=standard deviation

Supplementary Table 2. Sex-specific associations of GWAS-identified lipid SNPs with ln(TG) levels in the PAGE study.

| SNP/Gene                                       | Coded Allele | R/E* | Males |              |          |      | Females |              |          |       | P <sub>comb</sub> <sup>†</sup> | P <sub>diff</sub> <sup>‡</sup> | P <sub>het</sub> <sup>§</sup> |
|------------------------------------------------|--------------|------|-------|--------------|----------|------|---------|--------------|----------|-------|--------------------------------|--------------------------------|-------------------------------|
|                                                |              |      | CAF   | β (SE)       | P        | N    | CAF     | β (SE)       | P        | N     |                                |                                |                               |
| rs1883025<br><i>ABCA1</i>                      | A            | EA   | 0.25  | 0.00 (0.01)  | 8.65E-01 | 5877 | 0.25    | -0.02 (0.01) | 6.92E-03 | 6804  | 3.31E-02                       | 2.56E-02                       | 9.52E-02                      |
|                                                |              | AA   | 0.34  | -0.02 (0.03) | 4.39E-01 | 686  | 0.34    | 0.00 (0.01)  | 7.79E-01 | 890   | 9.81E-01                       | 7.13E-01                       | 4.11E-01                      |
|                                                |              | AI   | --    | --           | --       | --   | --      | --           | --       | --    | --                             | --                             | --                            |
|                                                |              | MA/H | 0.28  | 0.01 (0.03)  | 7.88E-01 | 961  | 0.26    | 0.01 (0.01)  | 3.90E-01 | 978   | 3.73E-01                       | 6.67E-01                       | 8.99E-01                      |
| rs3890182<br><i>ABCA1</i>                      | A            | EA   | 0.12  | -0.01 (0.01) | 3.11E-01 | 8419 | 0.12    | -0.01 (0.01) | 1.91E-01 | 14302 | 9.93E-02                       | 2.55E-01                       | 8.93E-01                      |
|                                                |              | AA   | 0.12  | 0.01 (0.02)  | 6.53E-01 | 3213 | 0.12    | -0.02 (0.01) | 4.21E-02 | 5883  | 1.24E-01                       | 1.15E-01                       | 1.61E-01                      |
|                                                |              | AI   | 0.04  | 0.01 (0.04)  | 7.90E-01 | 2613 | 0.04    | -0.04 (0.03) | 2.14E-01 | 4219  | 3.89E-01                       | 4.46E-01                       | 3.50E-01                      |
|                                                |              | MA/H | 0.08  | -0.05 (0.04) | 2.41E-01 | 1129 | 0.09    | -0.03 (0.02) | 6.93E-02 | 1815  | 3.34E-02                       | 9.67E-02                       | 7.05E-01                      |
| rs4149268<br><i>ABCA1</i>                      | A            | EA   | 0.37  | 0.01 (0.01)  | 5.66E-01 | 5866 | 0.37    | -0.02 (0.01) | 1.50E-02 | 6650  | 9.46E-02                       | 4.39E-02                       | 6.29E-02                      |
|                                                |              | AA   | 0.67  | 0.00 (0.02)  | 9.94E-01 | 2093 | 0.68    | 0.00 (0.01)  | 9.64E-01 | 2725  | 9.72E-01                       | 9.99E-01                       | 9.77E-01                      |
|                                                |              | AI   | --    | --           | --       | --   | --      | --           | --       | --    | --                             | --                             | --                            |
|                                                |              | MA/H | 0.31  | -0.01 (0.03) | 5.80E-01 | 1082 | 0.32    | 0.00 (0.01)  | 8.01E-01 | 1000  | 6.36E-01                       | 8.31E-01                       | 7.03E-01                      |
| rs6544713<br><i>ABCG8</i>                      | T            | EA   | 0.31  | 0.02 (0.01)  | 7.96E-02 | 6133 | 0.32    | 0.00 (0.01)  | 9.10E-01 | 11285 | 2.50E-01                       | 2.14E-01                       | 1.84E-01                      |
|                                                |              | AA   | 0.17  | -0.01 (0.02) | 6.61E-01 | 2824 | 0.17    | 0.02 (0.01)  | 5.30E-02 | 5433  | 1.69E-01                       | 1.40E-01                       | 1.53E-01                      |
|                                                |              | AI   | 0.09  | -0.03 (0.03) | 3.05E-01 | 2609 | 0.09    | 0.00 (0.02)  | 8.30E-01 | 4213  | 4.32E-01                       | 5.78E-01                       | 4.88E-01                      |
|                                                |              | MA/H | 0.16  | -0.04 (0.07) | 5.89E-01 | 182  | 0.22    | -0.01 (0.03) | 7.60E-01 | 851   | 6.29E-01                       | 8.25E-01                       | 6.97E-01                      |
| rs1748195<br><i>ANGPT3</i>                     | C            | EA   | 0.67  | 0.05 (0.01)  | 1.12E-05 | 5705 | 0.66    | 0.02 (0.01)  | 6.54E-04 | 10969 | 2.00E-07                       | 1.91E-07                       | 4.93E-02                      |
|                                                |              | AA   | 0.34  | 0.01 (0.02)  | 5.45E-01 | 1739 | 0.35    | 0.01 (0.01)  | 1.49E-01 | 4156  | 1.18E-01                       | 2.94E-01                       | 9.69E-01                      |
|                                                |              | AI   | --    | --           | --       | --   | 0.61    | 0.16 (0.07)  | 2.45E-02 | 132   | 2.45E-02                       |                                |                               |
|                                                |              | MA/H | 0.60  | 0.05 (0.03)  | 4.10E-02 | 959  | 0.59    | 0.02 (0.01)  | 2.17E-02 | 1746  | 3.75E-03                       | 8.88E-03                       | 3.08E-01                      |
| rs2967605<br><i>ANGPT4</i>                     | A            | EA   | 0.18  | 0.02 (0.01)  | 4.35E-02 | 8417 | 0.18    | 0.02 (0.01)  | 1.39E-02 | 9863  | 1.51E-03                       | 6.32E-03                       | 8.17E-01                      |
|                                                |              | AA   | 0.21  | 0.00 (0.01)  | 9.33E-01 | 3218 | 0.21    | 0.00 (0.01)  | 8.79E-01 | 4371  | 8.62E-01                       | 9.85E-01                       | 9.93E-01                      |
|                                                |              | AI   | 0.30  | 0.02 (0.02)  | 3.01E-01 | 2609 | 0.29    | 0.00 (0.01)  | 9.54E-01 | 4077  | 5.09E-01                       | 5.85E-01                       | 4.26E-01                      |
|                                                |              | MA/H | 0.23  | -0.04 (0.03) | 1.80E-01 | 1137 | 0.24    | 0.03 (0.01)  | 1.97E-02 | 1052  | 1.30E-01                       | 2.68E-02                       | 2.61E-02                      |
| rs28927680<br><i>APOA1/C3/<br/>A4/A5/BUD13</i> | G            | EA   | 0.93  | -0.13 (0.02) | 5.44E-17 | 9136 | 0.93    | -0.04 (0.01) | 3.77E-04 | 15137 | 2.25E-14                       | 9.81E-19                       | 7.42E-07                      |
|                                                |              | AA   | 0.84  | 0.03 (0.02)  | 9.08E-02 | 3507 | 0.84    | -0.01 (0.01) | 4.98E-01 | 6340  | 7.98E-01                       | 1.90E-01                       | 7.13E-02                      |
|                                                |              | AI   | 0.87  | -0.12 (0.02) | 1.86E-07 | 2612 | 0.87    | -0.11 (0.02) | 4.85E-12 | 4220  | 5.14E-18                       | 5.08E-17                       | 7.47E-01                      |
|                                                |              | MA/H | 0.85  | 0.07 (0.03)  | 2.63E-02 | 1142 | 0.87    | 0.02 (0.01)  | 1.79E-01 | 1830  | 3.30E-02                       | 3.43E-02                       | 1.38E-01                      |
| rs3135506<br><i>APOA5</i>                      | C            | EA   | 0.06  | 0.16 (0.02)  | 1.88E-22 | 8173 | 0.06    | 0.09 (0.01)  | 1.16E-13 | 9588  | 8.38E-32                       | 2.28E-33                       | 4.25E-04                      |
|                                                |              | AA   | 0.06  | 0.09 (0.03)  | 2.32E-03 | 2672 | 0.06    | 0.09 (0.02)  | 1.90E-08 | 3631  | 1.68E-10                       | 1.30E-09                       | 8.15E-01                      |
|                                                |              | AI   | 0.12  | 0.13 (0.02)  | 8.96E-08 | 2621 | 0.13    | 0.12 (0.02)  | 3.01E-13 | 4090  | 1.53E-19                       | 1.63E-18                       | 8.74E-01                      |

|                                     |   |      |      |              |          |      |      |              |          |       |          |          |          |
|-------------------------------------|---|------|------|--------------|----------|------|------|--------------|----------|-------|----------|----------|----------|
|                                     |   | MA/H | 0.14 | 0.15 (0.03)  | 1.38E-05 | 1130 | 0.13 | 0.06 (0.02)  | 1.09E-03 | 1045  | 1.18E-06 | 3.76E-07 | 1.48E-02 |
| rs964184                            | C | EA   | 0.86 | -0.17 (0.02) | 5.87E-26 | 4180 | 0.86 | -0.13 (0.01) | 1.28E-25 | 9117  | 6.30E-49 | 1.14E-48 | 3.52E-02 |
| <i>APOA1/C3/<br/>A4/A5</i>          |   | AA   | 0.80 | 0.02 (0.03)  | 4.01E-01 | 1033 | 0.80 | -0.04 (0.01) | 9.15E-03 | 3230  | 5.07E-02 | 2.35E-02 | 5.50E-02 |
|                                     |   | AI   | --   | --           | --       | --   | 0.78 | -0.17 (0.07) | 1.43E-02 | 132   | 1.43E-02 | --       | --       |
|                                     |   | MA/H | --   | --           | --       | --   | 0.75 | -0.12 (0.03) | 1.66E-05 | 772   | 1.66E-05 | --       | --       |
| rs562338                            | T | EA   | 0.19 | -0.01 (0.01) | 3.84E-01 | 6985 | 0.19 | -0.01 (0.01) | 5.12E-01 | 12576 | 2.92E-01 | 5.52E-01 | 7.76E-01 |
| <i>APOB</i>                         |   | AA   | 0.59 | -0.02 (0.01) | 8.97E-02 | 2527 | 0.59 | -0.02 (0.01) | 4.35E-02 | 4986  | 8.93E-03 | 3.08E-02 | 7.33E-01 |
|                                     |   | AI   | 0.08 | -0.03 (0.03) | 3.65E-01 | 2616 | 0.08 | -0.02 (0.02) | 2.92E-01 | 4216  | 1.66E-01 | 3.81E-01 | 9.13E-01 |
|                                     |   | MA/H | 0.16 | -0.14 (0.07) | 4.08E-02 | 182  | 0.19 | -0.04 (0.03) | 1.66E-01 | 853   | 3.67E-02 | 4.71E-02 | 1.87E-01 |
| rs693                               | T | EA   | 0.49 | 0.02 (0.01)  | 5.50E-03 | 6538 | 0.49 | 0.01 (0.01)  | 4.63E-02 | 12180 | 1.07E-03 | 2.90E-03 | 3.24E-01 |
| <i>APOB</i>                         |   | AA   | 0.24 | 0.02 (0.02)  | 1.72E-01 | 2463 | 0.23 | 0.02 (0.01)  | 3.06E-02 | 4878  | 1.06E-02 | 3.80E-02 | 9.86E-01 |
|                                     |   | AI   | 0.33 | 0.01 (0.02)  | 7.06E-01 | 2614 | 0.33 | 0.02 (0.01)  | 1.57E-01 | 4207  | 1.71E-01 | 3.43E-01 | 6.07E-01 |
|                                     |   | MA/H | 0.37 | 0.06 (0.05)  | 2.34E-01 | 182  | 0.41 | 0.02 (0.02)  | 3.62E-01 | 852   | 1.92E-01 | 3.26E-01 | 4.62E-01 |
| rs754523                            | T | EA   | 0.68 | -0.01 (0.01) | 5.98E-01 | 6541 | 0.68 | -0.01 (0.01) | 4.29E-01 | 7770  | 3.46E-01 | 6.37E-01 | 9.11E-01 |
| <i>APOB</i>                         |   | AA   | 0.78 | 0.00 (0.02)  | 8.15E-01 | 2457 | 0.79 | -0.01 (0.01) | 5.23E-01 | 3353  | 7.16E-01 | 7.93E-01 | 5.65E-01 |
|                                     |   | AI   | 0.69 | -0.02 (0.02) | 2.80E-01 | 2612 | 0.68 | -0.01 (0.01) | 4.88E-01 | 4075  | 2.32E-01 | 4.38E-01 | 6.38E-01 |
|                                     |   | MA/H | 0.71 | -0.10 (0.06) | 8.37E-02 | 180  | 0.69 | -0.06 (0.08) | 4.75E-01 | 80    | 6.82E-02 | 1.74E-01 | 6.75E-01 |
| rs10402271                          | T | EA   | 0.67 | 0.00 (0.01)  | 9.09E-01 | 5544 | 0.67 | -0.01 (0.01) | 4.71E-01 | 6631  | 5.36E-01 | 7.66E-01 | 6.99E-01 |
| <i>APOE/C1/<br/>C4</i>              |   | AA   | 0.84 | 0.00 (0.02)  | 8.32E-01 | 1621 | 0.84 | -0.04 (0.02) | 2.00E-02 | 2176  | 8.34E-02 | 6.54E-02 | 1.17E-01 |
|                                     |   | AI   | --   | --           | --       | --   | --   | --           | --       | --    | --       | --       | --       |
|                                     |   | MA/H | 0.61 | 0.05 (0.06)  | 3.90E-01 | 183  | 0.63 | 0.03 (0.07)  | 6.39E-01 | 81    | 3.35E-01 | 6.19E-01 | 8.58E-01 |
| rs4420638                           | A | EA   | 0.82 | -0.05 (0.01) | 2.06E-05 | 7246 | 0.83 | -0.03 (0.01) | 5.24E-04 | 13031 | 1.65E-07 | 2.77E-07 | 9.74E-02 |
| <i>APOE/C1/<br/>C4</i>              |   | AA   | 0.79 | 0.10 (0.02)  | 3.17E-07 | 2009 | 0.80 | 0.03 (0.01)  | 4.53E-04 | 4637  | 7.17E-08 | 4.38E-09 | 2.14E-03 |
|                                     |   | AI   | 0.92 | -0.03 (0.03) | 3.20E-01 | 2619 | 0.92 | -0.03 (0.02) | 1.55E-01 | 4214  | 8.30E-02 | 2.22E-01 | 9.76E-01 |
|                                     |   | MA/H | 0.90 | -0.11 (0.04) | 1.69E-02 | 905  | 0.89 | 0.00 (0.02)  | 9.63E-01 | 1689  | 3.44E-01 | 5.75E-02 | 2.83E-02 |
| rs4803750                           | A | EA   | 0.93 | -0.04 (0.02) | 6.58E-02 | 5566 | 0.93 | -0.01 (0.02) | 5.64E-01 | 6650  | 1.04E-01 | 1.56E-01 | 2.98E-01 |
| <i>BCL3</i>                         |   | AA   | 0.92 | 0.04 (0.03)  | 2.62E-01 | 1625 | 0.92 | -0.01 (0.02) | 5.51E-01 | 2193  | 8.57E-01 | 4.46E-01 | 2.08E-01 |
|                                     |   | AI   | --   | --           | --       | --   | --   | --           | --       | --    | --       | --       | --       |
|                                     |   | MA/H | 0.86 | 0.05 (0.08)  | 5.54E-01 | 183  | 0.84 | 0.13 (0.10)  | 2.18E-01 | 81    | 2.25E-01 | 3.94E-01 | 5.31E-01 |
| rs646776                            | A | EA   | 0.78 | 0.01 (0.01)  | 4.32E-01 | 6709 | 0.79 | 0.00 (0.01)  | 9.00E-01 | 7982  | 6.84E-01 | 7.28E-01 | 4.94E-01 |
| <i>CELSR2/<br/>PSCR1/<br/>SORT1</i> |   | AA   | 0.64 | -0.03 (0.01) | 3.91E-02 | 2753 | 0.65 | 0.00 (0.01)  | 9.89E-01 | 3799  | 2.13E-01 | 1.19E-01 | 1.00E-01 |
|                                     |   | AI   | 0.80 | 0.00 (0.03)  | 9.47E-01 | 1072 | 0.80 | 0.02 (0.02)  | 5.05E-01 | 1743  | 5.70E-01 | 7.99E-01 | 7.22E-01 |
|                                     |   | MA/H | 0.80 | -0.04 (0.07) | 5.39E-01 | 182  | 0.74 | -0.05 (0.08) | 5.29E-01 | 80    | 3.82E-01 | 6.79E-01 | 9.22E-01 |
| rs599839                            | A | EA   | 0.77 | 0.01 (0.01)  | 1.64E-01 | 6992 | 0.77 | 0.00 (0.01)  | 9.33E-01 | 8155  | 4.05E-01 | 3.78E-01 | 2.63E-01 |
| <i>CELSR2/<br/>PSCR1/</i>           |   | AA   | 0.28 | 0.01 (0.02)  | 6.31E-01 | 2527 | 0.28 | 0.01 (0.01)  | 5.83E-01 | 3471  | 4.66E-01 | 7.66E-01 | 9.65E-01 |
|                                     |   | AI   | 0.78 | 0.03 (0.02)  | 1.03E-01 | 2593 | 0.78 | 0.02 (0.01)  | 2.30E-01 | 4068  | 5.22E-02 | 1.29E-01 | 5.64E-01 |

|                                   |   |      |      |              |          |      |      |              |          |       |          |          |          |
|-----------------------------------|---|------|------|--------------|----------|------|------|--------------|----------|-------|----------|----------|----------|
| <i>SORT1</i>                      |   | MA/H | 0.77 | -0.01 (0.06) | 8.35E-01 | 178  | 0.72 | 0.00 (0.08)  | 9.98E-01 | 81    | 8.69E-01 | 9.78E-01 | 8.98E-01 |
| rs12596776                        | C | EA   | 0.90 | 0.01 (0.02)  | 7.35E-01 | 5856 | 0.90 | -0.01 (0.01) | 5.12E-01 | 6668  | 7.23E-01 | 7.62E-01 | 5.18E-01 |
| <i>CETP</i>                       |   | AA   | 0.94 | -0.03 (0.03) | 3.52E-01 | 2100 | 0.94 | 0.01 (0.02)  | 4.78E-01 | 2716  | 8.83E-01 | 5.04E-01 | 2.45E-01 |
|                                   |   | AI   | --   | --           | --       | --   | --   | --           | --       | --    | --       | --       | --       |
|                                   |   | MA/H | 0.94 | -0.04 (0.05) | 4.47E-01 | 1131 | 0.94 | 0.01 (0.02)  | 6.61E-01 | 1057  | 9.70E-01 | 6.80E-01 | 3.80E-01 |
| rs1566439                         | A | EA   | 0.60 | 0.03 (0.01)  | 2.41E-03 | 6988 | 0.60 | 0.00 (0.01)  | 8.65E-01 | 8386  | 6.51E-02 | 9.84E-03 | 1.57E-02 |
| <i>CETP</i>                       |   | AA   | 0.78 | -0.03 (0.02) | 1.26E-01 | 2309 | 0.78 | 0.00 (0.01)  | 7.98E-01 | 3081  | 3.16E-01 | 3.01E-01 | 2.37E-01 |
|                                   |   | AI   | --   | --           | --       | --   | --   | --           | --       | --    | --       | --       | --       |
|                                   |   | MA/H | 0.54 | 0.02 (0.02)  | 5.15E-01 | 1135 | 0.54 | -0.01 (0.01) | 3.02E-01 | 1058  | 5.23E-01 | 4.75E-01 | 2.98E-01 |
| rs1864163                         | A | EA   | 0.24 | 0.07 (0.06)  | 2.36E-01 | 182  | 0.21 | -0.08 (0.08) | 3.01E-01 | 109   | 7.70E-01 | 2.90E-01 | 1.22E-01 |
| <i>CETP</i>                       |   | AA   | 0.27 | 0.03 (0.04)  | 3.79E-01 | 367  | 0.24 | -0.01 (0.08) | 8.96E-01 | 84    | 4.61E-01 | 6.74E-01 | 6.20E-01 |
|                                   |   | AI   | --   | --           | --       | --   | --   | --           | --       | --    | --       | --       | --       |
|                                   |   | MA/H | 0.27 | -0.02 (0.06) | 6.88E-01 | 183  | 0.30 | 0.00 (0.09)  | 9.86E-01 | 82    | 7.29E-01 | 9.22E-01 | 8.38E-01 |
| rs3764261                         | T | EA   | 0.32 | -0.02 (0.01) | 8.42E-03 | 8587 | 0.33 | -0.01 (0.01) | 1.50E-01 | 10218 | 6.88E-03 | 1.10E-02 | 1.91E-01 |
| <i>CETP</i>                       |   | AA   | 0.31 | -0.01 (0.01) | 2.67E-01 | 3403 | 0.32 | -0.01 (0.01) | 2.46E-01 | 4641  | 1.16E-01 | 2.75E-01 | 7.43E-01 |
|                                   |   | AI   | 0.31 | -0.03 (0.02) | 1.23E-01 | 2597 | 0.31 | -0.04 (0.01) | 5.19E-04 | 4061  | 2.06E-04 | 7.33E-04 | 4.23E-01 |
|                                   |   | MA/H | 0.34 | -0.02 (0.03) | 3.58E-01 | 1083 | 0.32 | -0.03 (0.01) | 3.68E-02 | 1001  | 2.27E-02 | 7.40E-02 | 9.17E-01 |
| rs9989419                         | A | EA   | 0.40 | 0.01 (0.01)  | 1.21E-01 | 7706 | 0.40 | 0.01 (0.01)  | 2.66E-01 | 8959  | 6.38E-02 | 1.62E-01 | 6.51E-01 |
| <i>CETP</i>                       |   | AA   | 0.59 | -0.02 (0.01) | 1.50E-01 | 2812 | 0.60 | 0.01 (0.01)  | 4.91E-01 | 3902  | 7.57E-01 | 2.80E-01 | 1.18E-01 |
|                                   |   | AI   | 0.26 | 0.00 (0.02)  | 8.66E-01 | 2609 | 0.25 | 0.02 (0.01)  | 2.53E-01 | 4074  | 3.09E-01 | 5.13E-01 | 5.85E-01 |
|                                   |   | MA/H | 0.34 | 0.02 (0.05)  | 6.46E-01 | 181  | 0.40 | -0.06 (0.08) | 4.67E-01 | 81    | 9.67E-01 | 6.91E-01 | 3.90E-01 |
| rs16996148                        | T | EA   | 0.08 | -0.04 (0.01) | 2.96E-03 | 8377 | 0.08 | -0.02 (0.01) | 1.20E-02 | 14242 | 1.86E-04 | 5.12E-04 | 2.78E-01 |
| <i>CILP2/<br/>PBX4/<br/>NCAN1</i> |   | AA   | 0.15 | 0.00 (0.02)  | 7.72E-01 | 3190 | 0.15 | 0.00 (0.01)  | 8.81E-01 | 5858  | 9.91E-01 | 9.48E-01 | 7.44E-01 |
|                                   |   | AI   | 0.04 | -0.06 (0.04) | 1.35E-01 | 2618 | 0.04 | -0.06 (0.03) | 3.12E-02 | 4219  | 8.76E-03 | 3.21E-02 | 9.71E-01 |
|                                   |   | MA/H | 0.06 | -0.04 (0.05) | 4.34E-01 | 1141 | 0.06 | -0.05 (0.02) | 2.33E-02 | 1832  | 1.69E-02 | 5.62E-02 | 8.28E-01 |
| rs174547                          | T | EA   | 0.66 | -0.05 (0.01) | 1.17E-06 | 6796 | 0.66 | -0.03 (0.01) | 5.44E-05 | 7721  | 1.26E-09 | 2.10E-09 | 8.20E-02 |
| <i>FADS1</i>                      |   | AA   | 0.91 | -0.05 (0.02) | 3.56E-02 | 3186 | 0.92 | -0.04 (0.01) | 3.61E-03 | 4324  | 3.42E-04 | 1.59E-03 | 8.18E-01 |
|                                   |   | AI   | 0.17 | -0.08 (0.02) | 4.19E-04 | 2211 | 0.15 | -0.07 (0.02) | 1.29E-04 | 3517  | 2.12E-07 | 1.28E-06 | 6.72E-01 |
|                                   |   | MA/H | 0.39 | -0.03 (0.02) | 1.55E-01 | 1080 | 0.40 | -0.04 (0.01) | 2.71E-03 | 1003  | 9.04E-04 | 4.03E-03 | 9.68E-01 |
| rs2144300                         | T | EA   | 0.60 | -0.02 (0.01) | 5.97E-02 | 8327 | 0.60 | -0.02 (0.01) | 6.08E-04 | 14120 | 9.83E-05 | 4.74E-04 | 7.28E-01 |
| <i>GALNT2</i>                     |   | AA   | 0.14 | 0.00 (0.02)  | 8.41E-01 | 3200 | 0.16 | -0.01 (0.01) | 2.67E-01 | 5884  | 2.83E-01 | 5.30E-01 | 7.31E-01 |
|                                   |   | AI   | 0.55 | -0.01 (0.02) | 7.30E-01 | 2607 | 0.55 | -0.01 (0.01) | 3.03E-01 | 4205  | 3.00E-01 | 5.54E-01 | 7.44E-01 |
|                                   |   | MA/H | 0.57 | -0.01 (0.02) | 6.65E-01 | 1142 | 0.55 | -0.02 (0.01) | 3.73E-02 | 1829  | 3.72E-02 | 1.04E-01 | 6.68E-01 |
| rs1260326                         | T | EA   | 0.42 | 0.07 (0.01)  | 3.30E-16 | 6964 | 0.42 | 0.05 (0.01)  | 8.01E-16 | 12896 | 4.25E-29 | 2.55E-29 | 1.30E-02 |
| <i>GCKR</i>                       |   | AA   | 0.17 | 0.00 (0.03)  | 9.66E-01 | 882  | 0.15 | 0.04 (0.01)  | 8.29E-04 | 2748  | 1.80E-03 | 3.72E-03 | 2.31E-01 |
|                                   |   | AI   | --   | --           | --       | --   | 0.29 | 0.15 (0.09)  | 8.52E-02 | 131   | 8.52E-02 | --       | --       |

|              |   |      |      |              |          |      |      |              |          |       |          |          |          |
|--------------|---|------|------|--------------|----------|------|------|--------------|----------|-------|----------|----------|----------|
|              |   | MA/H | 0.32 | 0.06 (0.03)  | 2.42E-02 | 947  | 0.33 | 0.03 (0.01)  | 5.38E-03 | 1737  | 6.04E-04 | 1.64E-03 | 3.04E-01 |
| rs780094     | A | EA   | 0.40 | 0.07 (0.01)  | 2.10E-14 | 6544 | 0.40 | 0.06 (0.01)  | 5.60E-16 | 7779  | 9.18E-29 | 1.08E-27 | 6.46E-01 |
| <i>GCKR</i>  |   | AA   | 0.19 | 0.01 (0.02)  | 4.46E-01 | 2461 | 0.18 | 0.03 (0.01)  | 1.49E-02 | 3359  | 1.68E-02 | 3.85E-02 | 3.71E-01 |
|              |   | AI   | 0.21 | 0.07 (0.02)  | 3.61E-04 | 2615 | 0.20 | 0.03 (0.01)  | 7.63E-02 | 4086  | 3.94E-04 | 3.56E-04 | 6.90E-02 |
|              |   | MA/H | 0.34 | 0.12 (0.06)  | 4.68E-02 | 182  | 0.33 | 0.03 (0.08)  | 6.85E-01 | 81    | 6.46E-02 | 1.28E-01 | 4.02E-01 |
| rs12654264   | A | EA   | 0.62 | 0.02 (0.01)  | 3.09E-02 | 8415 | 0.62 | 0.00 (0.01)  | 6.92E-01 | 14295 | 1.26E-01 | 8.99E-02 | 1.15E-01 |
| <i>HMGCR</i> |   | AA   | 0.67 | 0.03 (0.01)  | 3.22E-02 | 3209 | 0.67 | 0.00 (0.01)  | 5.16E-01 | 5874  | 6.10E-01 | 8.18E-02 | 2.94E-02 |
|              |   | AI   | 0.57 | -0.04 (0.02) | 2.99E-02 | 2610 | 0.59 | 0.00 (0.01)  | 7.02E-01 | 4219  | 1.14E-01 | 8.78E-02 | 1.24E-01 |
|              |   | MA/H | 0.61 | -0.02 (0.03) | 4.18E-01 | 1129 | 0.62 | 0.00 (0.01)  | 8.13E-01 | 1814  | 9.15E-01 | 7.01E-01 | 4.03E-01 |
| rs2650000    | T | EA   | 0.35 | -0.01 (0.01) | 1.58E-01 | 7932 | 0.35 | 0.00 (0.01)  | 8.31E-01 | 9459  | 5.23E-01 | 3.61E-01 | 2.02E-01 |
| <i>HNF1A</i> |   | AA   | 0.12 | 0.04 (0.02)  | 3.95E-02 | 3134 | 0.12 | -0.01 (0.01) | 3.87E-01 | 4250  | 7.13E-01 | 8.25E-02 | 2.76E-02 |
|              |   | AI   | 0.41 | 0.00 (0.02)  | 8.70E-01 | 2611 | 0.41 | 0.01 (0.01)  | 5.49E-01 | 4087  | 5.61E-01 | 8.24E-01 | 8.25E-01 |
|              |   | MA/H | 0.36 | 0.02 (0.02)  | 5.37E-01 | 1137 | 0.36 | 0.01 (0.01)  | 3.21E-01 | 1050  | 2.44E-01 | 5.04E-01 | 9.06E-01 |
| rs1800961    | T | EA   | 0.03 | -0.05 (0.02) | 5.32E-02 | 7916 | 0.03 | -0.03 (0.02) | 4.40E-02 | 9451  | 5.97E-03 | 2.03E-02 | 6.31E-01 |
| <i>HNF4A</i> |   | AA   | 0.01 | -0.06 (0.07) | 3.50E-01 | 3127 | 0.01 | 0.00 (0.05)  | 9.84E-01 | 4245  | 5.99E-01 | 6.46E-01 | 4.40E-01 |
|              |   | AI   | 0.03 | -0.01 (0.04) | 8.93E-01 | 2617 | 0.03 | 0.01 (0.03)  | 8.43E-01 | 4089  | 9.43E-01 | 9.72E-01 | 8.19E-01 |
|              |   | MA/H | 0.04 | -0.03 (0.06) | 6.05E-01 | 1085 | 0.04 | 0.02 (0.03)  | 6.21E-01 | 1002  | 8.35E-01 | 7.74E-01 | 4.94E-01 |
| rs2271293    | A | EA   | 0.12 | 0.00 (0.01)  | 8.03E-01 | 7940 | 0.12 | -0.01 (0.01) | 6.87E-02 | 13884 | 9.60E-02 | 1.85E-01 | 4.37E-01 |
| <i>LCAT</i>  |   | AA   | 0.07 | 0.01 (0.02)  | 6.24E-01 | 3128 | 0.07 | 0.01 (0.01)  | 6.20E-01 | 5766  | 5.03E-01 | 7.84E-01 | 8.47E-01 |
|              |   | AI   | 0.25 | -0.05 (0.02) | 5.79E-03 | 2608 | 0.24 | 0.01 (0.01)  | 6.50E-01 | 4217  | 2.08E-01 | 2.00E-02 | 1.25E-02 |
|              |   | MA/H | 0.12 | 0.02 (0.04)  | 5.07E-01 | 1082 | 0.15 | 0.01 (0.02)  | 6.56E-01 | 1770  | 5.10E-01 | 7.27E-01 | 6.52E-01 |
| rs2228671    | T | EA   | 0.12 | 0.01 (0.02)  | 7.49E-01 | 2692 | 0.12 | 0.00 (0.01)  | 8.92E-01 | 3509  | 9.69E-01 | 9.42E-01 | 7.30E-01 |
| <i>LDLR</i>  |   | AA   | 0.04 | 0.01 (0.05)  | 8.13E-01 | 1235 | 0.04 | -0.04 (0.03) | 1.51E-01 | 1312  | 2.38E-01 | 3.46E-01 | 3.93E-01 |
|              |   | AI   | --   | --           | --       | --   | --   | --           | --       | --    | --       | --       | --       |
|              |   | MA/H | 0.08 | 0.07 (0.04)  | 9.58E-02 | 1120 | 0.08 | 0.02 (0.02)  | 4.37E-01 | 1051  | 1.53E-01 | 1.85E-01 | 2.48E-01 |
| rs6511720    | T | EA   | 0.12 | 0.01 (0.01)  | 5.25E-01 | 7707 | 0.12 | -0.01 (0.01) | 1.76E-01 | 13393 | 4.97E-01 | 3.27E-01 | 1.83E-01 |
| <i>LDLR</i>  |   | AA   | 0.14 | -0.02 (0.02) | 3.59E-01 | 2817 | 0.13 | -0.01 (0.01) | 3.17E-01 | 5420  | 1.81E-01 | 3.98E-01 | 8.20E-01 |
|              |   | AI   | 0.05 | 0.11 (0.04)  | 2.80E-03 | 2605 | 0.04 | -0.03 (0.03) | 1.83E-01 | 4216  | 5.54E-01 | 4.70E-03 | 1.29E-03 |
|              |   | MA/H | 0.10 | 0.22 (0.08)  | 6.69E-03 | 182  | 0.09 | -0.10 (0.04) | 6.50E-03 | 852   | 1.62E-01 | 6.21E-04 | 3.46E-04 |
| rs261332     | A | EA   | 0.20 | 0.00 (0.01)  | 9.40E-01 | 4439 | 0.20 | 0.02 (0.01)  | 5.08E-02 | 4926  | 1.32E-01 | 1.48E-01 | 2.13E-01 |
| <i>LIPC</i>  |   | AA   | 0.24 | 0.00 (0.02)  | 8.26E-01 | 1399 | 0.25 | 0.03 (0.02)  | 8.88E-02 | 1827  | 1.40E-01 | 2.29E-01 | 3.83E-01 |
|              |   | AI   | --   | --           | --       | --   | --   | --           | --       | --    | --       | --       | --       |
|              |   | MA/H | 0.20 | -0.06 (0.06) | 3.83E-01 | 179  | 0.16 | -0.10 (0.10) | 3.27E-01 | 80    | 2.05E-01 | 4.23E-01 | 7.34E-01 |
| rs4775041    | C | EA   | 0.29 | 0.01 (0.01)  | 1.15E-01 | 8391 | 0.29 | 0.01 (0.01)  | 1.96E-01 | 9843  | 4.92E-02 | 1.25E-01 | 5.91E-01 |
| <i>LIPC</i>  |   | AA   | 0.14 | 0.05 (0.02)  | 1.22E-02 | 3211 | 0.13 | 0.02 (0.01)  | 1.09E-01 | 4353  | 7.54E-03 | 1.20E-02 | 1.91E-01 |
|              |   | AI   | 0.21 | 0.03 (0.02)  | 1.37E-01 | 2518 | 0.21 | 0.02 (0.01)  | 2.10E-01 | 4088  | 5.77E-02 | 1.51E-01 | 6.69E-01 |

|                 |   |      |       |              |          |      |       |              |          |       |          |          |          |
|-----------------|---|------|-------|--------------|----------|------|-------|--------------|----------|-------|----------|----------|----------|
|                 |   | MA/H | 0.18  | 0.00 (0.03)  | 9.44E-01 | 1139 | 0.18  | 0.02 (0.01)  | 3.07E-01 | 1052  | 3.77E-01 | 5.93E-01 | 6.06E-01 |
| rs2156552       | T | EA   | 0.17  | 0.00 (0.01)  | 8.33E-01 | 8420 | 0.16  | 0.00 (0.01)  | 7.60E-01 | 9873  | 7.11E-01 | 9.34E-01 | 9.95E-01 |
| <i>LIPG</i>     |   | AA   | 0.05  | 0.05 (0.03)  | 8.41E-02 | 3210 | 0.04  | -0.02 (0.02) | 2.40E-01 | 4362  | 9.41E-01 | 1.13E-01 | 3.69E-02 |
|                 |   | AI   | 0.04  | 0.06 (0.04)  | 9.81E-02 | 2613 | 0.04  | -0.05 (0.03) | 1.58E-01 | 4083  | 9.98E-01 | 9.39E-02 | 2.96E-02 |
|                 |   | MA/H | 0.07  | -0.02 (0.04) | 6.00E-01 | 1131 | 0.08  | -0.01 (0.02) | 7.02E-01 | 1047  | 5.73E-01 | 8.10E-01 | 7.48E-01 |
| rs2197089       | T | EA   | 0.55  | -0.04 (0.01) | 4.01E-06 | 8424 | 0.56  | -0.03 (0.01) | 6.43E-09 | 14301 | 1.51E-13 | 1.12E-12 | 5.24E-01 |
| <i>LPL</i>      |   | AA   | 0.78  | -0.01 (0.01) | 6.75E-01 | 3223 | 0.78  | -0.02 (0.01) | 3.44E-02 | 5893  | 4.12E-02 | 9.77E-02 | 4.87E-01 |
|                 |   | AI   | 0.41  | -0.05 (0.02) | 1.48E-03 | 2615 | 0.41  | -0.05 (0.01) | 7.72E-06 | 4217  | 4.10E-08 | 2.84E-07 | 9.59E-01 |
|                 |   | MA/H | 0.46  | -0.06 (0.02) | 1.05E-02 | 1141 | 0.48  | -0.02 (0.01) | 4.57E-02 | 1824  | 4.21E-03 | 5.12E-03 | 1.25E-01 |
| rs328           | C | EA   | 0.90  | 0.11 (0.01)  | 6.75E-16 | 8241 | 0.90  | 0.07 (0.01)  | 7.23E-15 | 14057 | 7.80E-28 | 4.52E-28 | 1.29E-02 |
| <i>LPL</i>      |   | AA   | 0.93  | 0.11 (0.03)  | 1.56E-04 | 2658 | 0.93  | 0.06 (0.01)  | 5.75E-05 | 5097  | 1.16E-07 | 2.37E-07 | 1.22E-01 |
|                 |   | AI   | 0.97  | 0.04 (0.05)  | 4.11E-01 | 2618 | 0.97  | 0.09 (0.04)  | 1.74E-02 | 4225  | 1.82E-02 | 4.21E-02 | 3.84E-01 |
|                 |   | MA/H | 0.94  | 0.10 (0.05)  | 3.55E-02 | 1131 | 0.93  | 0.05 (0.02)  | 2.58E-02 | 1818  | 4.08E-03 | 9.12E-03 | 2.85E-01 |
| rs6586891       | A | EA   | 0.65  | -0.05 (0.01) | 1.04E-07 | 7008 | 0.65  | -0.03 (0.01) | 4.84E-06 | 12569 | 6.41E-12 | 2.01E-11 | 1.58E-01 |
| <i>LPL</i>      |   | AA   | 0.84  | -0.01 (0.02) | 6.03E-01 | 2525 | 0.84  | -0.03 (0.01) | 5.29E-03 | 5007  | 8.51E-03 | 1.78E-02 | 2.89E-01 |
|                 |   | AI   | 0.45  | -0.02 (0.02) | 1.67E-01 | 2605 | 0.45  | -0.02 (0.01) | 1.29E-01 | 4210  | 4.17E-02 | 1.22E-01 | 8.00E-01 |
|                 |   | MA/H | 0.55  | -0.01 (0.05) | 8.79E-01 | 183  | 0.58  | -0.03 (0.02) | 1.63E-01 | 852   | 1.84E-01 | 3.74E-01 | 6.54E-01 |
| rs6102059       | T | EA   | 0.30  | -0.01 (0.01) | 5.00E-01 | 4442 | 0.30  | -0.01 (0.01) | 4.34E-01 | 4951  | 3.01E-01 | 5.86E-01 | 9.95E-01 |
| <i>MAFB</i>     |   | AA   | 0.41  | -0.02 (0.02) | 3.69E-01 | 1412 | 0.42  | 0.02 (0.01)  | 1.39E-01 | 1832  | 5.27E-01 | 2.24E-01 | 1.08E-01 |
|                 |   | AI   | --    | --           | --       | --   | --    | --           | --       | --    | --       | --       | --       |
|                 |   | MA/H | 0.26  | 0.06 (0.06)  | 3.42E-01 | 182  | 0.30  | 0.00 (0.08)  | 9.68E-01 | 80    | 4.38E-01 | 6.36E-01 | 5.81E-01 |
| rs17145738      | T | EA   | 0.12  | -0.07 (0.01) | 9.92E-10 | 8433 | 0.12  | -0.06 (0.01) | 2.48E-15 | 14308 | 1.98E-23 | 1.81E-22 | 4.72E-01 |
| <i>MLXIPL</i>   |   | AA   | 0.09  | -0.02 (0.02) | 2.95E-01 | 3224 | 0.09  | -0.02 (0.01) | 5.35E-02 | 5884  | 2.81E-02 | 8.96E-02 | 9.89E-01 |
|                 |   | AI   | 0.07  | -0.07 (0.03) | 1.52E-02 | 2615 | 0.07  | -0.05 (0.02) | 4.17E-02 | 4211  | 2.04E-03 | 6.59E-03 | 4.70E-01 |
|                 |   | MA/H | 0.08  | -0.04 (0.04) | 3.84E-01 | 1142 | 0.07  | -0.07 (0.02) | 9.54E-04 | 1828  | 7.74E-04 | 2.91E-03 | 5.45E-01 |
| rs2338104       | C | EA   | 0.46  | 0.01 (0.01)  | 2.74E-01 | 8422 | 0.46  | -0.01 (0.01) | 2.23E-01 | 9877  | 7.33E-01 | 2.62E-01 | 1.09E-01 |
| <i>MMAB-MVK</i> |   | AA   | 0.28  | 0.00 (0.01)  | 9.32E-01 | 3211 | 0.26  | -0.01 (0.01) | 5.07E-01 | 4366  | 6.07E-01 | 8.00E-01 | 6.70E-01 |
|                 |   | AI   | 0.57  | 0.00 (0.02)  | 8.40E-01 | 2598 | 0.58  | -0.02 (0.01) | 7.57E-02 | 4047  | 1.93E-01 | 2.02E-01 | 2.21E-01 |
|                 |   | MA/H | 0.53  | 0.01 (0.02)  | 8.02E-01 | 1137 | 0.52  | 0.02 (0.01)  | 1.55E-01 | 1055  | 1.69E-01 | 3.52E-01 | 6.56E-01 |
| rs11206510      | T | EA   | 0.81  | 0.00 (0.01)  | 9.15E-01 | 8433 | 0.81  | 0.01 (0.01)  | 1.17E-01 | 14307 | 1.69E-01 | 2.90E-01 | 4.46E-01 |
| <i>PCSK9</i>    |   | AA   | 0.86  | 0.03 (0.02)  | 5.49E-02 | 3217 | 0.86  | 0.00 (0.01)  | 6.56E-01 | 5893  | 1.78E-01 | 1.43E-01 | 1.50E-01 |
|                 |   | AI   | 0.94  | 0.01 (0.03)  | 7.26E-01 | 2618 | 0.94  | 0.10 (0.02)  | 9.22E-05 | 4221  | 7.63E-04 | 4.46E-04 | 4.31E-02 |
|                 |   | MA/H | 0.90  | -0.01 (0.04) | 8.73E-01 | 1142 | 0.87  | -0.01 (0.02) | 6.00E-01 | 1827  | 5.85E-01 | 8.61E-01 | 9.65E-01 |
| rs11591147      | T | EA   | 0.02  | 0.00 (0.03)  | 9.80E-01 | 8909 | 0.02  | -0.01 (0.02) | 6.62E-01 | 14936 | 7.11E-01 | 9.09E-01 | 8.16E-01 |
| <i>PCSK9</i>    |   | AA   | <0.01 | -0.13 (0.12) | 3.14E-01 | 2842 | <0.01 | -0.09 (0.05) | 4.92E-02 | 5342  | 2.81E-02 | 8.70E-02 | 8.01E-01 |
|                 |   | AI   | 0.01  | 0.21 (0.14)  | 1.20E-01 | 1069 | 0.01  | -0.13 (0.08) | 1.06E-01 | 2344  | 5.32E-01 | 8.10E-02 | 3.14E-02 |

|               |   |      |       |              |          |      |      |              |          |      |          |          |          |
|---------------|---|------|-------|--------------|----------|------|------|--------------|----------|------|----------|----------|----------|
|               |   | MA/H | <0.01 | -0.22 (0.23) | 3.46E-01 | 953  | 0.01 | 0.03 (0.07)  | 6.50E-01 | 1736 | 8.72E-01 | 5.78E-01 | 3.01E-01 |
| rs7679        | T | EA   | 0.82  | -0.01 (0.01) | 3.04E-01 | 5445 | 0.82 | -0.01 (0.01) | 4.05E-01 | 6092 | 1.93E-01 | 4.17E-01 | 8.17E-01 |
| <i>PLTP</i>   |   | AA   | 0.96  | 0.02 (0.03)  | 4.75E-01 | 2534 | 0.96 | -0.04 (0.03) | 1.24E-01 | 3481 | 4.45E-01 | 2.37E-01 | 1.30E-01 |
|               |   | AI   | 0.95  | -0.01 (0.03) | 7.27E-01 | 2617 | 0.95 | 0.01 (0.03)  | 6.18E-01 | 4082 | 8.51E-01 | 8.31E-01 | 5.63E-01 |
|               |   | MA/H | 0.88  | 0.04 (0.08)  | 6.13E-01 | 184  | 0.92 | -0.11 (0.13) | 3.80E-01 | 83   | 9.47E-01 | 5.98E-01 | 3.12E-01 |
| rs1501908     | G | EA   | 0.63  | 0.01 (0.01)  | 5.68E-01 | 6868 | 0.64 | 0.00 (0.01)  | 6.93E-01 | 7823 | 5.17E-01 | 7.86E-01 | 8.04E-01 |
| <i>TIMD4</i>  |   | AA   | 0.37  | 0.01 (0.01)  | 2.95E-01 | 3219 | 0.37 | 0.00 (0.01)  | 9.92E-01 | 4366 | 5.96E-01 | 5.77E-01 | 3.66E-01 |
|               |   | AI   | 0.87  | 0.03 (0.02)  | 1.38E-01 | 2601 | 0.88 | 0.03 (0.02)  | 8.66E-02 | 4055 | 2.38E-02 | 7.68E-02 | 8.90E-01 |
|               |   | MA/H | 0.77  | 0.01 (0.03)  | 8.50E-01 | 1140 | 0.76 | -0.01 (0.01) | 2.75E-01 | 1060 | 3.64E-01 | 5.42E-01 | 5.26E-01 |
| rs2075650     | A | EA   | 0.87  | 0.00 (0.03)  | 9.37E-01 | 1283 | 0.88 | 0.00 (0.03)  | 8.88E-01 | 1797 | 8.74E-01 | 9.87E-01 | 9.73E-01 |
| <i>TOMM40</i> |   | AA   | 0.87  | -0.06 (0.04) | 1.55E-01 | 572  | 0.86 | -0.02 (0.04) | 6.70E-01 | 433  | 1.98E-01 | 3.32E-01 | 4.60E-01 |
|               |   | AI   | --    | --           | --       | --   | --   | --           | --       | --   | --       | --       | --       |
|               |   | MA/H | 0.90  | 0.04 (0.08)  | 6.01E-01 | 185  | 0.92 | -0.10 (0.12) | 4.37E-01 | 83   | 9.97E-01 | 6.45E-01 | 3.49E-01 |
| rs2954029     | A | EA   | 0.54  | 0.06 (0.01)  | 9.84E-10 | 5877 | 0.53 | 0.03 (0.01)  | 1.27E-06 | 6803 | 1.26E-13 | 5.92E-14 | 1.50E-02 |
| <i>TRIB1</i>  |   | AA   | 0.67  | -0.07 (0.03) | 1.42E-02 | 686  | 0.68 | 0.02 (0.01)  | 1.80E-01 | 890  | 7.71E-01 | 2.01E-02 | 5.46E-03 |
|               |   | AI   | --    | --           | --       | --   | --   | --           | --       | --   | --       | --       | --       |
|               |   | MA/H | 0.61  | 0.05 (0.03)  | 7.34E-02 | 959  | 0.63 | 0.03 (0.01)  | 3.62E-03 | 978  | 7.13E-04 | 2.91E-03 | 6.46E-01 |
| rs471364      | A | EA   | 0.89  | -0.01 (0.01) | 3.82E-01 | 7940 | 0.88 | 0.01 (0.01)  | 3.72E-01 | 9470 | 8.10E-01 | 4.58E-01 | 2.20E-01 |
| <i>TTC39B</i> |   | AA   | 0.81  | 0.03 (0.02)  | 8.87E-02 | 3129 | 0.81 | -0.02 (0.01) | 8.35E-02 | 4242 | 5.66E-01 | 5.25E-02 | 1.83E-02 |
|               |   | AI   | 0.97  | 0.00 (0.04)  | 9.45E-01 | 2602 | 0.97 | 0.04 (0.03)  | 2.18E-01 | 4067 | 3.53E-01 | 4.67E-01 | 4.18E-01 |
|               |   | MA/H | 0.92  | 0.03 (0.04)  | 4.77E-01 | 1087 | 0.92 | 0.04 (0.02)  | 7.06E-02 | 1001 | 5.28E-02 | 1.51E-01 | 8.74E-01 |

\* Abbreviations: RE=race/ethnicity: EA=European American; AA=African American; AI=American Indian; MA/H=Mexican American/Hispanic; CAF = coding allele frequency; SE=standard error.

<sup>†</sup>P-value for SNP-phenotype association in the sex-combined meta-analysis, not allowing for different effects by sex.

<sup>‡</sup>P-value for SNP-phenotype association in the sex-combined meta-analysis, allowing for different effects by sex.

<sup>§</sup>P-value for heterogeneity by sex.

<sup>||</sup>Data not available.



Supplementary Table 3. Sex-specific associations of GWAS-identified lipid SNPs with LDL-C levels in the PAGE study.

| SNP/Gene                            | Coded Allele | Population * | Males |              |          |      | Females |              |          |       | P <sub>comb</sub> <sup>†</sup> | P <sub>diff</sub> <sup>‡</sup> | P <sub>net</sub> <sup>§</sup> |
|-------------------------------------|--------------|--------------|-------|--------------|----------|------|---------|--------------|----------|-------|--------------------------------|--------------------------------|-------------------------------|
|                                     |              |              | CAF   | β (SE)       | P        | N    | CAF     | β (SE)       | P        | N     |                                |                                |                               |
| rs1883025<br><i>ABCA1</i>           | A            | EA           | 0.25  | -1.94 (0.76) | 1.10E-02 | 5571 | 0.25    | -1.28 (0.59) | 3.02E-02 | 6521  | 1.08E-03                       | 3.77E-03                       | 4.96E-01                      |
|                                     |              | AA           | 0.34  | -4.23 (2.45) | 8.41E-02 | 525  | 0.34    | -0.43 (1.06) | 6.83E-01 | 694   | 2.89E-01                       | 2.07E-01                       | 1.54E-01                      |
|                                     |              | AI           | --    | --           | --       | --   | --      | --           | --       | --    | --                             | --                             | --                            |
|                                     |              | MA/H         | 0.28  | 0.99 (1.89)  | 6.02E-01 | 747  | 0.26    | 0.15 (0.92)  | 8.74E-01 | 794   | 7.11E-01                       | 8.62E-01                       | 6.89E-01                      |
| rs3890182<br><i>ABCA1</i>           | A            | EA           | 0.12  | -1.04 (0.83) | 2.06E-01 | 8092 | 0.12    | -1.26 (0.62) | 4.08E-02 | 12430 | 1.66E-02                       | 5.55E-02                       | 8.34E-01                      |
|                                     |              | AA           | 0.12  | -0.92 (1.43) | 5.21E-01 | 3044 | 0.12    | -0.11 (0.95) | 9.09E-01 | 5552  | 6.52E-01                       | 8.09E-01                       | 6.38E-01                      |
|                                     |              | AI           | 0.04  | 3.91 (2.47)  | 1.13E-01 | 2615 | 0.04    | 1.79 (1.86)  | 3.36E-01 | 4210  | 8.54E-02                       | 1.80E-01                       | 4.92E-01                      |
|                                     |              | MA/H         | 0.08  | 2.53 (3.01)  | 4.02E-01 | 919  | 0.09    | -0.71 (1.36) | 6.02E-01 | 1591  | 8.96E-01                       | 6.14E-01                       | 3.28E-01                      |
| rs4149268<br><i>ABCA1</i>           | A            | EA           | 0.37  | -0.81 (0.68) | 2.29E-01 | 5573 | 0.37    | -0.09 (0.53) | 8.65E-01 | 6393  | 3.83E-01                       | 4.78E-01                       | 3.98E-01                      |
|                                     |              | AA           | 0.67  | 0.22 (1.38)  | 8.74E-01 | 1925 | 0.68    | -0.51 (0.87) | 5.60E-01 | 2520  | 6.83E-01                       | 8.33E-01                       | 6.56E-01                      |
|                                     |              | AI           | --    | --           | --       | --   | --      | --           | --       | --    | --                             | --                             | --                            |
|                                     |              | MA/H         | 0.31  | 1.70 (1.72)  | 3.22E-01 | 886  | 0.32    | -0.11 (0.85) | 8.95E-01 | 825   | 7.48E-01                       | 6.07E-01                       | 3.44E-01                      |
| rs6544713<br><i>ABCG8</i>           | T            | EA           | 0.31  | 4.31 (0.68)  | 2.18E-10 | 6024 | 0.31    | 2.32 (0.61)  | 1.55E-04 | 9672  | 1.64E-12                       | 1.33E-12                       | 2.94E-02                      |
|                                     |              | AA           | 0.17  | 2.75 (1.31)  | 3.67E-02 | 2809 | 0.17    | 1.47 (0.98)  | 1.36E-01 | 5296  | 1.45E-02                       | 3.72E-02                       | 4.36E-01                      |
|                                     |              | AI           | 0.09  | 4.82 (1.64)  | 3.33E-03 | 2611 | 0.09    | 4.90 (1.28)  | 1.30E-04 | 4204  | 1.43E-06                       | 8.81E-06                       | 9.68E-01                      |
|                                     |              | MA/H         | 0.16  | 2.76 (4.78)  | 5.64E-01 | 181  | 0.22    | 0.65 (2.21)  | 7.70E-01 | 808   | 6.12E-01                       | 8.11E-01                       | 6.88E-01                      |
| rs1748195<br><i>ANGPT3</i>          | C            | EA           | 0.67  | 1.94 (0.72)  | 6.69E-03 | 5405 | 0.66    | 1.57 (0.50)  | 1.72E-03 | 9146  | 3.76E-05                       | 1.85E-04                       | 6.69E-01                      |
|                                     |              | AA           | 0.34  | 2.24 (1.50)  | 1.36E-01 | 1568 | 0.35    | 1.17 (0.78)  | 1.34E-01 | 3826  | 4.38E-02                       | 1.07E-01                       | 5.27E-01                      |
|                                     |              | AI           | --    | --           | --       | --   | 0.61    | -0.37 (6.47) | 9.55E-01 | 125   | 9.55E-01                       | --                             | --                            |
|                                     |              | MA/H         | 0.60  | 1.92 (1.76)  | 2.76E-01 | 748  | 0.59    | 0.84 (0.73)  | 2.46E-01 | 1523  | 1.37E-01                       | 2.82E-01                       | 5.74E-01                      |
| rs2967605<br><i>ANGPT4</i>          | A            | EA           | 0.18  | -0.08 (0.68) | 9.03E-01 | 8093 | 0.18    | 1.04 (0.55)  | 5.89E-02 | 9545  | 1.66E-01                       | 1.67E-01                       | 1.97E-01                      |
|                                     |              | AA           | 0.21  | -0.11 (1.15) | 9.24E-01 | 3043 | 0.21    | -0.09 (0.82) | 9.12E-01 | 4160  | 8.84E-01                       | 9.89E-01                       | 9.89E-01                      |
|                                     |              | AI           | 0.30  | -0.61 (0.97) | 5.28E-01 | 2611 | 0.29    | -1.37 (0.74) | 6.56E-02 | 4075  | 6.48E-02                       | 1.50E-01                       | 5.38E-01                      |
|                                     |              | MA/H         | 0.23  | 0.24 (1.89)  | 8.97E-01 | 926  | 0.24    | 1.46 (0.89)  | 1.01E-01 | 867   | 1.24E-01                       | 2.59E-01                       | 5.60E-01                      |
| rs28927680<br><i>APOA1/C3/A4/A5</i> | G            | EA           | 0.93  | 1.00 (1.03)  | 3.31E-01 | 8795 | 0.93    | -0.41 (0.79) | 6.06E-01 | 13251 | 8.53E-01                       | 5.46E-01                       | 2.78E-01                      |
|                                     |              | AA           | 0.84  | 1.01 (1.26)  | 4.24E-01 | 3330 | 0.84    | 0.33 (0.83)  | 6.92E-01 | 6007  | 4.40E-01                       | 6.71E-01                       | 6.54E-01                      |
|                                     |              | AI           | 0.87  | -3.11 (1.31) | 1.75E-02 | 2614 | 0.87    | -1.51 (0.93) | 1.02E-01 | 4211  | 6.78E-03                       | 1.56E-02                       | 3.20E-01                      |
|                                     |              | MA/H         | 0.85  | 1.90 (2.33)  | 4.15E-01 | 928  | 0.87    | -0.37 (1.06) | 7.25E-01 | 1603  | 9.87E-01                       | 6.74E-01                       | 3.75E-01                      |

|                                                 |   |      |      |               |          |      |      |              |          |       |          |          |          |
|-------------------------------------------------|---|------|------|---------------|----------|------|------|--------------|----------|-------|----------|----------|----------|
| rs3135506<br><i>APOA5</i>                       | C | EA   | 0.06 | -1.32 (1.13)  | 2.41E-01 | 7832 | 0.06 | 1.15 (0.93)  | 2.17E-01 | 9257  | 8.38E-01 | 2.35E-01 | 9.10E-02 |
|                                                 |   | AA   | 0.06 | -0.79 (2.35)  | 7.37E-01 | 2500 | 0.06 | 1.98 (1.55)  | 2.03E-01 | 3421  | 3.81E-01 | 4.20E-01 | 3.26E-01 |
|                                                 |   | AI   | 0.12 | 2.96 (1.32)   | 2.44E-02 | 2623 | 0.13 | 1.35 (0.94)  | 1.51E-01 | 4088  | 1.33E-02 | 2.83E-02 | 3.19E-01 |
|                                                 |   | MA/H | 0.14 | 2.11 (2.42)   | 3.83E-01 | 920  | 0.13 | 0.64 (1.16)  | 5.79E-01 | 861   | 3.80E-01 | 5.85E-01 | 5.84E-01 |
| rs964184<br><i>APOA1/C3/<br/>A4/A5</i>          | C | EA   | 0.86 | -0.95 (1.14)  | 4.05E-01 | 4086 | 0.86 | -2.94 (1.02) | 4.18E-03 | 7516  | 7.21E-03 | 1.17E-02 | 1.95E-01 |
|                                                 |   | AA   | 0.80 | 0.40 (2.25)   | 8.57E-01 | 1023 | 0.80 | -2.03 (1.41) | 1.50E-01 | 3098  | 2.60E-01 | 3.48E-01 | 3.58E-01 |
|                                                 |   | AI   | --   | --            | --       | --   | 0.78 | -0.92 (5.71) | 8.72E-01 | 125   | 8.72E-01 | --       | --       |
|                                                 |   | MA/H | --   | --            | --       | --   | 0.75 | -1.00 (2.20) | 6.50E-01 | 731   | 6.50E-01 | --       | --       |
| rs562338<br><i>APOB</i>                         | T | EA   | 0.19 | -5.32 (0.73)  | 3.30E-13 | 6858 | 0.19 | -5.96 (0.66) | 1.62E-19 | 10930 | 4.73E-31 | 5.16E-30 | 5.14E-01 |
|                                                 |   | AA   | 0.59 | -3.08 (1.04)  | 2.93E-03 | 2514 | 0.59 | -2.15 (0.80) | 7.17E-03 | 4852  | 7.95E-05 | 3.21E-04 | 4.78E-01 |
|                                                 |   | AI   | 0.08 | -3.93 (1.62)  | 1.53E-02 | 2618 | 0.08 | -5.35 (1.22) | 1.08E-05 | 4207  | 6.56E-07 | 3.26E-06 | 4.83E-01 |
|                                                 |   | MA/H | 0.16 | -6.58 (5.03)  | 1.91E-01 | 181  | 0.19 | -1.50 (2.34) | 5.21E-01 | 810   | 2.57E-01 | 3.46E-01 | 3.59E-01 |
| rs693<br><i>APOB</i>                            | T | EA   | 0.49 | 2.77 (0.59)   | 2.43E-06 | 6425 | 0.50 | 3.83 (0.52)  | 2.68E-13 | 10544 | 8.53E-18 | 3.53E-17 | 1.76E-01 |
|                                                 |   | AA   | 0.24 | 2.80 (1.25)   | 2.57E-02 | 2451 | 0.23 | 0.33 (0.93)  | 7.20E-01 | 4744  | 1.07E-01 | 7.78E-02 | 1.14E-01 |
|                                                 |   | AI   | 0.33 | 4.50 (0.93)   | 1.32E-06 | 2616 | 0.33 | 3.53 (0.68)  | 1.95E-07 | 4198  | 1.73E-12 | 1.05E-11 | 3.99E-01 |
|                                                 |   | MA/H | 0.37 | 4.22 (3.92)   | 2.82E-01 | 181  | 0.41 | 1.95 (1.97)  | 3.22E-01 | 809   | 1.71E-01 | 3.43E-01 | 6.05E-01 |
| rs754523<br><i>APOB</i>                         | T | EA   | 0.68 | -3.04 (0.63)  | 1.43E-06 | 6428 | 0.68 | -4.00 (0.61) | 7.10E-11 | 7686  | 9.38E-16 | 5.07E-15 | 2.77E-01 |
|                                                 |   | AA   | 0.78 | -2.09 (1.26)  | 9.59E-02 | 2445 | 0.79 | -2.17 (1.10) | 4.90E-02 | 3342  | 9.97E-03 | 3.60E-02 | 9.61E-01 |
|                                                 |   | AI   | 0.69 | -3.85 (0.96)  | 6.21E-05 | 2614 | 0.68 | -3.99 (0.70) | 1.28E-08 | 4073  | 3.53E-12 | 3.00E-11 | 9.05E-01 |
|                                                 |   | MA/H | 0.71 | -11.68 (4.02) | 3.66E-03 | 179  | 0.69 | 2.75 (6.67)  | 6.80E-01 | 78    | 2.28E-02 | 1.34E-02 | 6.38E-02 |
| rs10402271<br><i>APOE/C1/<br/>C4</i>            | T | EA   | 0.67 | -2.29 (0.69)  | 8.74E-04 | 5430 | 0.67 | -2.23 (0.69) | 1.27E-03 | 6548  | 3.63E-06 | 2.16E-05 | 9.51E-01 |
|                                                 |   | AA   | 0.84 | 1.33 (1.94)   | 4.93E-01 | 1609 | 0.84 | -3.09 (1.69) | 6.77E-02 | 2165  | 3.55E-01 | 1.49E-01 | 8.58E-02 |
|                                                 |   | AI   | --   | --            | --       | --   | --   | --           | --       | --    | --       | --       | --       |
|                                                 |   | MA/H | 0.61 | 1.06 (4.12)   | 7.97E-01 | 182  | 0.63 | 5.08 (5.96)  | 3.94E-01 | 79    | 4.86E-01 | 6.73E-01 | 5.79E-01 |
| rs4420638<br><i>APOE/C1/<br/>C4</i>             | A | EA   | 0.82 | -4.62 (0.77)  | 1.65E-09 | 6925 | 0.82 | -4.79 (0.56) | 9.07E-18 | 11179 | 9.57E-26 | 1.16E-24 | 8.60E-01 |
|                                                 |   | AA   | 0.80 | 1.59 (1.54)   | 3.04E-01 | 1837 | 0.80 | -0.01 (0.90) | 9.92E-01 | 4307  | 6.11E-01 | 5.90E-01 | 3.72E-01 |
|                                                 |   | AI   | 0.92 | -0.81 (1.66)  | 6.25E-01 | 2621 | 0.92 | -5.51 (1.23) | 7.95E-06 | 4205  | 1.06E-04 | 4.08E-05 | 2.30E-02 |
|                                                 |   | MA/H | 0.90 | -5.64 (2.99)  | 5.94E-02 | 708  | 0.89 | -2.60 (1.22) | 3.35E-02 | 1476  | 7.33E-03 | 1.76E-02 | 3.48E-01 |
| rs4803750<br><i>BCL3</i>                        | A | EA   | 0.93 | 6.01 (1.34)   | 7.16E-06 | 5451 | 0.93 | 5.19 (1.25)  | 3.53E-05 | 6566  | 1.15E-09 | 7.92E-09 | 6.53E-01 |
|                                                 |   | AA   | 0.92 | 6.97 (2.71)   | 1.01E-02 | 1613 | 0.92 | -1.97 (2.29) | 3.90E-01 | 2182  | 3.15E-01 | 2.53E-02 | 1.18E-02 |
|                                                 |   | AI   | --   | --            | --       | --   | --   | --           | --       | --    | --       | --       | --       |
|                                                 |   | MA/H | 0.86 | 6.06 (5.57)   | 2.77E-01 | 182  | 0.84 | 7.21 (8.75)  | 4.10E-01 | 79    | 1.74E-01 | 3.94E-01 | 9.11E-01 |
| rs646776<br><i>CELSR2/<br/>PSCR1/<br/>SORT1</i> | A | EA   | 0.78 | 5.79 (0.70)   | 8.93E-17 | 6590 | 0.79 | 6.59 (0.67)  | 1.03E-22 | 7893  | 1.02E-37 | 1.07E-36 | 4.11E-01 |
|                                                 |   | AA   | 0.64 | 3.27 (1.05)   | 1.88E-03 | 2739 | 0.65 | 5.07 (0.90)  | 1.96E-08 | 3786  | 3.28E-10 | 1.10E-09 | 1.93E-01 |
|                                                 |   | AI   | 0.80 | 4.55 (1.62)   | 4.87E-03 | 1074 | 0.80 | 6.93 (1.31)  | 1.18E-07 | 1741  | 3.93E-09 | 1.51E-08 | 2.52E-01 |
|                                                 |   | MA/H | 0.80 | 10.18 (4.91)  | 3.83E-02 | 181  | 0.74 | 0.37 (7.15)  | 9.59E-01 | 78    | 8.25E-02 | 1.17E-01 | 2.58E-01 |

|            |   |      |      |              |          |      |      |              |          |       |          |          |          |
|------------|---|------|------|--------------|----------|------|------|--------------|----------|-------|----------|----------|----------|
| rs599839   | A | EA   | 0.77 | 5.65 (0.68)  | 6.79E-17 | 6866 | 0.77 | 6.06 (0.66)  | 4.58E-20 | 8062  | 2.63E-35 | 3.43E-34 | 6.64E-01 |
|            |   | AA   | 0.28 | 0.81 (1.13)  | 4.70E-01 | 2514 | 0.28 | 1.95 (1.01)  | 5.27E-02 | 3459  | 5.43E-02 | 1.18E-01 | 4.50E-01 |
|            |   | AI   | 0.78 | 5.93 (1.03)  | 1.03E-08 | 2595 | 0.78 | 6.43 (0.79)  | 3.15E-16 | 4066  | 2.11E-23 | 2.31E-22 | 6.96E-01 |
|            |   | MA/H | 0.77 | 8.35 (4.66)  | 7.31E-02 | 177  | 0.72 | 1.39 (6.81)  | 8.38E-01 | 79    | 1.11E-01 | 1.96E-01 | 3.99E-01 |
| rs12596776 | C | EA   | 0.90 | 1.40 (1.14)  | 2.17E-01 | 5557 | 0.90 | -0.27 (0.86) | 7.56E-01 | 6391  | 6.19E-01 | 4.45E-01 | 2.42E-01 |
|            |   | AA   | 0.94 | 0.56 (2.76)  | 8.41E-01 | 1928 | 0.95 | 3.12 (1.71)  | 6.75E-02 | 2512  | 9.67E-02 | 1.84E-01 | 4.29E-01 |
|            |   | AI   | --   | --           | --       | --   | --   | --           | --       | --    | --       | --       | --       |
|            |   | MA/H | 0.94 | -2.73 (3.15) | 3.85E-01 | 920  | 0.94 | 0.36 (1.63)  | 8.27E-01 | 871   | 8.36E-01 | 6.69E-01 | 3.83E-01 |
| rs1566439  | A | EA   | 0.60 | 0.64 (0.61)  | 2.88E-01 | 6670 | 0.60 | 0.88 (0.46)  | 5.71E-02 | 8075  | 3.10E-02 | 9.32E-02 | 7.59E-01 |
|            |   | AA   | 0.78 | -0.43 (1.46) | 7.68E-01 | 2136 | 0.78 | 0.80 (0.96)  | 4.03E-01 | 2874  | 5.91E-01 | 6.75E-01 | 4.81E-01 |
|            |   | AI   | --   | --           | --       | --   | --   | --           | --       | --    | --       | --       | --       |
|            |   | MA/H | 0.54 | -1.73 (1.58) | 2.72E-01 | 923  | 0.54 | -0.88 (0.78) | 2.58E-01 | 872   | 1.34E-01 | 2.89E-01 | 6.26E-01 |
| rs1864163  | A | EA   | 0.24 | -1.74 (3.76) | 6.43E-01 | 181  | 0.21 | -1.70 (5.55) | 7.60E-01 | 109   | 5.79E-01 | 8.57E-01 | 9.95E-01 |
|            |   | AA   | 0.27 | -1.30 (3.62) | 7.18E-01 | 367  | 0.24 | 5.30 (6.95)  | 4.46E-01 | 84    | 9.74E-01 | 7.01E-01 | 3.99E-01 |
|            |   | AI   | --   | --           | --       | --   | --   | --           | --       | --    | --       | --       | --       |
|            |   | MA/H | 0.27 | 1.87 (4.18)  | 6.54E-01 | 182  | 0.30 | -5.05 (7.14) | 4.79E-01 | 80    | 9.76E-01 | 7.04E-01 | 4.03E-01 |
| rs3764261  | T | EA   | 0.32 | -0.86 (0.56) | 1.22E-01 | 8265 | 0.33 | -0.85 (0.45) | 5.57E-02 | 9916  | 1.39E-02 | 4.84E-02 | 9.90E-01 |
|            |   | AA   | 0.31 | -1.06 (0.99) | 2.82E-01 | 3230 | 0.32 | -1.21 (0.70) | 8.26E-02 | 4434  | 4.15E-02 | 1.24E-01 | 9.03E-01 |
|            |   | AI   | 0.31 | 0.09 (0.95)  | 9.23E-01 | 2599 | 0.31 | -0.48 (0.71) | 4.98E-01 | 4059  | 6.28E-01 | 7.91E-01 | 6.29E-01 |
|            |   | MA/H | 0.34 | -0.85 (1.78) | 6.35E-01 | 887  | 0.32 | 0.41 (0.84)  | 6.26E-01 | 825   | 8.13E-01 | 7.93E-01 | 5.23E-01 |
| rs9989419  | A | EA   | 0.40 | 0.38 (0.56)  | 4.92E-01 | 7568 | 0.40 | 0.33 (0.54)  | 5.45E-01 | 8856  | 3.61E-01 | 6.58E-01 | 9.43E-01 |
|            |   | AA   | 0.59 | -0.37 (1.00) | 7.08E-01 | 2797 | 0.60 | -0.03 (0.87) | 9.68E-01 | 3889  | 7.83E-01 | 9.32E-01 | 7.97E-01 |
|            |   | AI   | 0.26 | 1.63 (1.01)  | 1.06E-01 | 2611 | 0.25 | 1.92 (0.77)  | 1.23E-02 | 4072  | 2.99E-03 | 1.19E-02 | 8.23E-01 |
|            |   | MA/H | 0.34 | 6.00 (3.86)  | 1.20E-01 | 180  | 0.40 | -2.19 (6.53) | 7.37E-01 | 79    | 2.43E-01 | 2.82E-01 | 2.80E-01 |
| rs16996148 | T | EA   | 0.08 | -3.44 (0.96) | 3.50E-04 | 8047 | 0.08 | -2.11 (0.76) | 5.63E-03 | 12374 | 1.14E-05 | 3.60E-05 | 2.79E-01 |
|            |   | AA   | 0.15 | 0.82 (1.29)  | 5.26E-01 | 3015 | 0.15 | 0.49 (0.85)  | 5.68E-01 | 5528  | 4.09E-01 | 6.95E-01 | 8.31E-01 |
|            |   | AI   | 0.04 | -3.94 (2.31) | 8.82E-02 | 2620 | 0.04 | 1.24 (1.76)  | 4.80E-01 | 4210  | 6.38E-01 | 1.82E-01 | 7.43E-02 |
|            |   | MA/H | 0.06 | -2.73 (3.53) | 4.40E-01 | 927  | 0.06 | -1.69 (1.56) | 2.79E-01 | 1605  | 1.93E-01 | 4.13E-01 | 7.87E-01 |
| rs174547   | T | EA   | 0.66 | 2.01 (0.64)  | 1.64E-03 | 6504 | 0.66 | 1.45 (0.49)  | 3.26E-03 | 7464  | 2.13E-05 | 9.22E-05 | 4.82E-01 |
|            |   | AA   | 0.91 | -0.26 (1.60) | 8.74E-01 | 3014 | 0.92 | 0.09 (1.17)  | 9.39E-01 | 4119  | 9.75E-01 | 9.84E-01 | 8.62E-01 |
|            |   | AI   | 0.17 | 7.41 (1.30)  | 1.15E-08 | 2214 | 0.15 | 6.15 (1.03)  | 2.12E-09 | 3519  | 1.77E-16 | 1.31E-15 | 4.45E-01 |
|            |   | MA/H | 0.39 | 1.53 (1.65)  | 3.52E-01 | 883  | 0.40 | 1.36 (0.77)  | 7.79E-02 | 828   | 4.65E-02 | 1.37E-01 | 9.24E-01 |
| rs2144300  | T | EA   | 0.60 | -0.17 (0.54) | 7.58E-01 | 7999 | 0.60 | -0.09 (0.42) | 8.37E-01 | 12263 | 7.25E-01 | 9.34E-01 | 9.06E-01 |
|            |   | AA   | 0.14 | -0.74 (1.33) | 5.80E-01 | 3026 | 0.16 | 0.51 (0.81)  | 5.32E-01 | 5551  | 8.06E-01 | 7.06E-01 | 4.25E-01 |
|            |   | AI   | 0.55 | 0.93 (0.87)  | 2.86E-01 | 2609 | 0.55 | 0.86 (0.65)  | 1.86E-01 | 4196  | 8.97E-02 | 2.36E-01 | 9.50E-01 |
|            |   | MA/H | 0.57 | -0.11 (1.63) | 9.45E-01 | 930  | 0.55 | -1.04 (0.73) | 1.54E-01 | 1604  | 1.84E-01 | 3.61E-01 | 6.02E-01 |

|                            |   |      |      |               |          |      |      |              |          |       |          |          |          |
|----------------------------|---|------|------|---------------|----------|------|------|--------------|----------|-------|----------|----------|----------|
| rs1260326<br><i>GCKR</i>   | T | EA   | 0.42 | 0.95 (0.61)   | 1.20E-01 | 6645 | 0.41 | 0.09 (0.44)  | 8.40E-01 | 11028 | 2.81E-01 | 2.92E-01 | 2.54E-01 |
|                            |   | AA   | 0.17 | -2.16 (2.33)  | 3.53E-01 | 723  | 0.15 | 1.28 (1.13)  | 2.59E-01 | 2429  | 5.42E-01 | 3.43E-01 | 1.84E-01 |
|                            |   | AI   | --   | --            | --       | --   | 0.28 | 7.25 (6.26)  | 2.47E-01 | 124   | 2.47E-01 | --       | --       |
|                            |   | MA/H | 0.32 | -2.11 (1.86)  | 2.59E-01 | 738  | 0.33 | 0.30 (0.78)  | 7.03E-01 | 1514  | 9.35E-01 | 4.91E-01 | 2.34E-01 |
| rs780094<br><i>GCKR</i>    | A | EA   | 0.40 | 0.65 (0.60)   | 2.80E-01 | 6430 | 0.40 | 0.78 (0.58)  | 1.83E-01 | 7695  | 8.77E-02 | 2.30E-01 | 8.76E-01 |
|                            |   | AA   | 0.19 | -0.08 (1.32)  | 9.49E-01 | 2449 | 0.18 | 1.90 (1.19)  | 1.11E-01 | 3348  | 2.53E-01 | 2.80E-01 | 2.65E-01 |
|                            |   | AI   | 0.21 | -0.99 (1.13)  | 3.83E-01 | 2617 | 0.20 | 1.61 (0.86)  | 6.05E-02 | 4084  | 3.31E-01 | 1.17E-01 | 6.76E-02 |
|                            |   | MA/H | 0.34 | -0.70 (4.31)  | 8.72E-01 | 181  | 0.33 | -1.65 (6.95) | 8.12E-01 | 79    | 7.93E-01 | 9.59E-01 | 9.07E-01 |
| rs12654264<br><i>HMGCR</i> | A | EA   | 0.62 | -4.03 (0.54)  | 8.25E-14 | 8088 | 0.62 | -1.17 (0.42) | 5.98E-03 | 12424 | 1.23E-11 | 1.72E-14 | 3.06E-05 |
|                            |   | AA   | 0.67 | -0.79 (0.97)  | 4.15E-01 | 3040 | 0.67 | -2.61 (0.67) | 8.80E-05 | 5544  | 2.18E-04 | 3.26E-04 | 1.23E-01 |
|                            |   | AI   | 0.57 | -1.93 (0.93)  | 3.71E-02 | 2612 | 0.59 | -0.95 (0.68) | 1.62E-01 | 4210  | 1.82E-02 | 4.28E-02 | 3.94E-01 |
|                            |   | MA/H | 0.61 | -4.05 (1.75)  | 2.05E-02 | 919  | 0.62 | -1.06 (0.76) | 1.66E-01 | 1589  | 2.80E-02 | 2.61E-02 | 1.17E-01 |
| rs2650000<br><i>HNF1A</i>  | T | EA   | 0.35 | 1.01 (0.56)   | 7.30E-02 | 7615 | 0.35 | 1.08 (0.45)  | 1.72E-02 | 9149  | 2.88E-03 | 1.17E-02 | 9.19E-01 |
|                            |   | AA   | 0.12 | 0.93 (1.46)   | 5.23E-01 | 2961 | 0.12 | -0.13 (1.03) | 9.03E-01 | 4042  | 7.88E-01 | 8.09E-01 | 5.54E-01 |
|                            |   | AI   | 0.41 | 1.35 (0.89)   | 1.31E-01 | 2613 | 0.41 | 0.50 (0.66)  | 4.52E-01 | 4085  | 1.33E-01 | 2.41E-01 | 4.44E-01 |
|                            |   | MA/H | 0.36 | 0.66 (1.71)   | 7.01E-01 | 924  | 0.36 | 2.36 (0.82)  | 4.20E-03 | 866   | 6.04E-03 | 1.54E-02 | 3.70E-01 |
| rs1800961<br><i>HNF4A</i>  | T | EA   | 0.03 | -1.34 (1.62)  | 4.05E-01 | 7611 | 0.03 | -4.08 (1.23) | 8.77E-04 | 9160  | 1.61E-03 | 2.78E-03 | 1.78E-01 |
|                            |   | AA   | 0.01 | -10.70 (5.75) | 6.26E-02 | 2957 | 0.01 | -8.22 (4.24) | 5.25E-02 | 4038  | 7.69E-03 | 2.69E-02 | 7.29E-01 |
|                            |   | AI   | 0.03 | 1.00 (2.39)   | 6.76E-01 | 2619 | 0.03 | -2.55 (1.92) | 1.83E-01 | 4087  | 4.37E-01 | 3.78E-01 | 2.47E-01 |
|                            |   | MA/H | 0.04 | 2.66 (4.15)   | 5.22E-01 | 887  | 0.04 | -1.09 (2.00) | 5.86E-01 | 826   | 8.32E-01 | 7.03E-01 | 4.16E-01 |
| rs2271293<br><i>LCAT</i>   | A | EA   | 0.12 | -1.33 (0.83)  | 1.10E-01 | 7632 | 0.12 | -0.84 (0.64) | 1.87E-01 | 12042 | 4.36E-02 | 1.17E-01 | 6.36E-01 |
|                            |   | AA   | 0.07 | -2.45 (1.86)  | 1.86E-01 | 2958 | 0.07 | -1.19 (1.15) | 3.02E-01 | 5437  | 1.15E-01 | 2.45E-01 | 5.61E-01 |
|                            |   | AI   | 0.25 | -1.89 (1.02)  | 6.39E-02 | 2610 | 0.24 | 0.29 (0.77)  | 7.06E-01 | 4208  | 4.17E-01 | 1.67E-01 | 8.77E-02 |
|                            |   | MA/H | 0.12 | -3.86 (2.52)  | 1.26E-01 | 888  | 0.15 | -0.44 (1.04) | 6.74E-01 | 1554  | 3.31E-01 | 2.84E-01 | 2.10E-01 |
| rs2228671<br><i>LDLR</i>   | T | EA   | 0.12 | -1.50 (1.45)  | 3.01E-01 | 2476 | 0.12 | 0.54 (0.89)  | 5.40E-01 | 3254  | 9.86E-01 | 4.85E-01 | 2.29E-01 |
|                            |   | AA   | 0.04 | 4.08 (4.48)   | 3.63E-01 | 1080 | 0.04 | 4.67 (2.33)  | 4.45E-02 | 1122  | 2.76E-02 | 8.78E-02 | 9.06E-01 |
|                            |   | AI   | --   | --            | --       | --   | --   | --           | --       | --    | --       | --       | --       |
|                            |   | MA/H | 0.08 | 5.46 (2.91)   | 6.08E-02 | 917  | 0.08 | 0.36 (1.44)  | 8.00E-01 | 865   | 2.91E-01 | 1.67E-01 | 1.16E-01 |
| rs6511720<br><i>LDLR</i>   | T | EA   | 0.12 | -7.31 (0.83)  | 1.06E-18 | 7566 | 0.12 | -7.58 (0.76) | 1.17E-23 | 11736 | 1.04E-40 | 1.55E-39 | 8.14E-01 |
|                            |   | AA   | 0.14 | -7.50 (1.42)  | 1.29E-07 | 2803 | 0.13 | -8.00 (1.08) | 1.12E-13 | 5284  | 8.36E-20 | 8.76E-19 | 7.80E-01 |
|                            |   | AI   | 0.05 | -5.46 (2.20)  | 1.29E-02 | 2607 | 0.04 | -0.22 (1.56) | 8.86E-01 | 4207  | 1.19E-01 | 4.50E-02 | 5.20E-02 |
|                            |   | MA/H | 0.10 | -4.51 (5.92)  | 4.46E-01 | 181  | 0.09 | -6.64 (2.97) | 2.54E-02 | 809   | 1.93E-02 | 6.15E-02 | 7.48E-01 |
| rs261332<br><i>LIPC</i>    | A | EA   | 0.20 | 0.18 (0.93)   | 8.46E-01 | 4340 | 0.20 | -1.84 (0.97) | 5.91E-02 | 4876  | 2.45E-01 | 1.65E-01 | 1.34E-01 |
|                            |   | AA   | 0.24 | -1.85 (1.80)  | 3.02E-01 | 1389 | 0.25 | -1.68 (1.66) | 3.10E-01 | 1816  | 1.48E-01 | 3.51E-01 | 9.45E-01 |
|                            |   | AI   | --   | --            | --       | --   | --   | --           | --       | --    | --       | --       | --       |
|                            |   | MA/H | 0.20 | 6.12 (4.66)   | 1.88E-01 | 178  | 0.16 | 13.40 (8.22) | 1.03E-01 | 78    | 5.15E-02 | 1.12E-01 | 4.41E-01 |

|                              |   |      |      |              |          |      |      |               |          |       |          |          |          |
|------------------------------|---|------|------|--------------|----------|------|------|---------------|----------|-------|----------|----------|----------|
| rs4775041<br><i>LIPC</i>     | C | EA   | 0.29 | 0.97 (0.58)  | 9.49E-02 | 8066 | 0.29 | -0.14 (0.47)  | 7.57E-01 | 9524  | 4.21E-01 | 2.36E-01 | 1.35E-01 |
|                              |   | AA   | 0.14 | -2.06 (1.37) | 1.33E-01 | 3036 | 0.13 | 0.22 (0.97)   | 8.24E-01 | 4142  | 4.94E-01 | 3.16E-01 | 1.75E-01 |
|                              |   | AI   | 0.21 | -0.23 (1.04) | 8.26E-01 | 2620 | 0.21 | -1.64 (0.82)  | 4.63E-02 | 4086  | 8.89E-02 | 1.34E-01 | 2.88E-01 |
|                              |   | MA/H | 0.18 | 1.41 (2.07)  | 4.98E-01 | 927  | 0.18 | -1.31 (1.00)  | 1.91E-01 | 866   | 3.78E-01 | 3.38E-01 | 2.38E-01 |
| rs2156552<br><i>LIPG</i>     | T | EA   | 0.17 | 0.63 (0.70)  | 3.72E-01 | 8093 | 0.16 | 0.95 (0.57)   | 9.72E-02 | 9553  | 6.44E-02 | 1.70E-01 | 7.23E-01 |
|                              |   | AA   | 0.05 | -2.39 (2.33) | 3.05E-01 | 3040 | 0.04 | -0.14 (1.71)  | 9.33E-01 | 4154  | 5.00E-01 | 5.89E-01 | 4.38E-01 |
|                              |   | AI   | 0.04 | -0.47 (2.17) | 8.28E-01 | 2615 | 0.04 | 2.63 (1.90)   | 1.65E-01 | 4081  | 3.67E-01 | 3.73E-01 | 2.82E-01 |
|                              |   | MA/H | 0.07 | -0.81 (3.01) | 7.88E-01 | 922  | 0.08 | 1.19 (1.35)   | 3.78E-01 | 863   | 4.88E-01 | 6.54E-01 | 5.44E-01 |
| rs2197089<br><i>LPL</i>      | T | EA   | 0.55 | 0.62 (0.54)  | 2.48E-01 | 8095 | 0.56 | -0.86 (0.41)  | 3.54E-02 | 12431 | 3.32E-01 | 5.62E-02 | 2.82E-02 |
|                              |   | AA   | 0.78 | -0.63 (1.11) | 5.68E-01 | 3049 | 0.78 | 0.41 (0.76)   | 5.87E-01 | 5560  | 9.00E-01 | 7.33E-01 | 4.37E-01 |
|                              |   | AI   | 0.41 | 0.24 (0.92)  | 7.97E-01 | 2617 | 0.41 | 1.77 (0.66)   | 6.99E-03 | 4208  | 1.91E-02 | 2.54E-02 | 1.73E-01 |
|                              |   | MA/H | 0.46 | 0.64 (1.61)  | 6.92E-01 | 928  | 0.48 | -0.21 (0.71)  | 7.70E-01 | 1599  | 9.14E-01 | 8.86E-01 | 6.30E-01 |
| rs328<br><i>LPL</i>          | C | EA   | 0.90 | -0.96 (0.90) | 2.89E-01 | 7900 | 0.90 | 0.85 (0.69)   | 2.17E-01 | 12172 | 7.32E-01 | 2.66E-01 | 1.11E-01 |
|                              |   | AA   | 0.93 | -1.12 (2.28) | 6.21E-01 | 2487 | 0.93 | -1.37 (1.35)  | 3.12E-01 | 4765  | 2.62E-01 | 5.31E-01 | 9.27E-01 |
|                              |   | AI   | 0.97 | -8.21 (2.76) | 2.98E-03 | 2620 | 0.97 | -4.89 (2.24)  | 2.92E-02 | 4216  | 3.66E-04 | 1.12E-03 | 3.51E-01 |
|                              |   | MA/H | 0.94 | -7.68 (3.34) | 2.17E-02 | 921  | 0.93 | -0.48 (1.51)  | 7.51E-01 | 1593  | 2.17E-01 | 6.81E-02 | 4.99E-02 |
| rs6586891<br><i>LPL</i>      | A | EA   | 0.65 | 0.66 (0.60)  | 2.71E-01 | 6881 | 0.65 | -0.09 (0.55)  | 8.68E-01 | 10926 | 5.35E-01 | 5.39E-01 | 3.56E-01 |
|                              |   | AA   | 0.84 | -0.02 (1.39) | 9.87E-01 | 2512 | 0.84 | 1.72 (1.05)   | 1.03E-01 | 4872  | 1.97E-01 | 2.65E-01 | 3.18E-01 |
|                              |   | AI   | 0.45 | -0.92 (0.89) | 3.00E-01 | 2607 | 0.45 | 0.72 (0.65)   | 2.65E-01 | 4201  | 7.73E-01 | 3.14E-01 | 1.35E-01 |
|                              |   | MA/H | 0.55 | 0.57 (3.70)  | 8.78E-01 | 182  | 0.58 | 0.16 (1.90)   | 9.33E-01 | 809   | 8.85E-01 | 9.85E-01 | 9.21E-01 |
| rs6102059<br><i>MAFB</i>     | T | EA   | 0.30 | -0.63 (0.83) | 4.49E-01 | 4343 | 0.30 | 0.42 (0.85)   | 6.18E-01 | 4901  | 8.47E-01 | 6.63E-01 | 3.76E-01 |
|                              |   | AA   | 0.41 | -2.71 (1.63) | 9.77E-02 | 1402 | 0.42 | 0.07 (1.47)   | 9.61E-01 | 1822  | 2.83E-01 | 2.54E-01 | 2.07E-01 |
|                              |   | AI   | --   | --           | --       | --   | --   | --            | --       | --    | --       | --       | --       |
|                              |   | MA/H | 0.26 | -0.96 (4.55) | 8.32E-01 | 181  | 0.30 | -10.77 (6.80) | 1.13E-01 | 78    | 2.91E-01 | 2.79E-01 | 2.31E-01 |
| rs17145738<br><i>MLXIPL</i>  | T | EA   | 0.12 | -0.06 (0.81) | 9.39E-01 | 8103 | 0.12 | 1.24 (0.63)   | 5.02E-02 | 12435 | 1.36E-01 | 1.46E-01 | 2.04E-01 |
|                              |   | AA   | 0.09 | -1.65 (1.64) | 3.13E-01 | 3050 | 0.09 | 2.93 (1.09)   | 7.40E-03 | 5551  | 9.51E-02 | 1.66E-02 | 2.00E-02 |
|                              |   | AI   | 0.07 | 2.14 (1.65)  | 1.95E-01 | 2617 | 0.07 | 0.89 (1.27)   | 4.83E-01 | 4202  | 1.78E-01 | 3.38E-01 | 5.48E-01 |
|                              |   | MA/H | 0.08 | -4.45 (3.03) | 1.41E-01 | 929  | 0.07 | -1.13 (1.37)  | 4.10E-01 | 1602  | 1.74E-01 | 2.41E-01 | 3.17E-01 |
| rs2338104<br><i>MMAB-MVK</i> | C | EA   | 0.46 | -0.40 (0.52) | 4.38E-01 | 8092 | 0.46 | -0.93 (0.43)  | 2.86E-02 | 9558  | 2.88E-02 | 6.74E-02 | 4.33E-01 |
|                              |   | AA   | 0.28 | 0.18 (1.03)  | 8.63E-01 | 3036 | 0.27 | -1.48 (0.76)  | 5.00E-02 | 4156  | 1.40E-01 | 1.44E-01 | 1.93E-01 |
|                              |   | AI   | 0.57 | 1.46 (0.90)  | 1.03E-01 | 2600 | 0.58 | -1.02 (0.68)  | 1.31E-01 | 4045  | 8.26E-01 | 8.48E-02 | 2.71E-02 |
|                              |   | MA/H | 0.53 | -0.21 (1.59) | 8.95E-01 | 924  | 0.52 | 0.04 (0.84)   | 9.67E-01 | 870   | 9.81E-01 | 9.91E-01 | 8.92E-01 |
| rs11206510<br><i>PCSK9</i>   | T | EA   | 0.81 | 3.37 (0.67)  | 5.35E-07 | 8103 | 0.81 | 0.84 (0.52)   | 1.09E-01 | 12436 | 1.40E-05 | 9.49E-07 | 2.95E-03 |
|                              |   | AA   | 0.86 | -2.03 (1.37) | 1.40E-01 | 3043 | 0.86 | 1.09 (0.90)   | 2.25E-01 | 5560  | 8.38E-01 | 1.62E-01 | 5.77E-02 |
|                              |   | AI   | 0.94 | -0.10 (1.98) | 9.59E-01 | 2620 | 0.94 | -1.44 (1.50)  | 3.37E-01 | 4212  | 4.26E-01 | 6.30E-01 | 5.89E-01 |
|                              |   | MA/H | 0.90 | 2.34 (2.67)  | 3.80E-01 | 928  | 0.87 | 1.56 (1.04)   | 1.33E-01 | 1602  | 8.58E-02 | 2.20E-01 | 7.85E-01 |

|                            |   |      |       |                |          |      |       |               |          |       |          |          |          |
|----------------------------|---|------|-------|----------------|----------|------|-------|---------------|----------|-------|----------|----------|----------|
| rs11591147<br><i>PCSK9</i> | T | EA   | 0.02  | -18.91 (2.10)  | 2.41E-19 | 8573 | 0.02  | -13.76 (1.74) | 3.05E-15 | 13066 | 3.29E-32 | 7.59E-32 | 5.90E-02 |
|                            |   | AA   | <0.01 | -18.81 (9.12)  | 3.92E-02 | 2677 | <0.01 | -23.41 (6.00) | 9.76E-05 | 5205  | 1.15E-05 | 5.97E-05 | 6.74E-01 |
|                            |   | AI   | 0.01  | -12.82 (8.52)  | 1.32E-01 | 1069 | 0.01  | -13.13 (4.88) | 7.16E-03 | 2337  | 2.06E-03 | 8.64E-03 | 9.75E-01 |
|                            |   | MA/H | <0.01 | -27.29 (13.89) | 4.95E-02 | 743  | 0.01  | -14.57 (4.40) | 9.35E-04 | 1513  | 1.79E-04 | 6.05E-04 | 3.83E-01 |
| rs7679<br><i>PLTP</i>      | T | EA   | 0.82  | -0.99 (0.86)   | 2.49E-01 | 5347 | 0.82  | 0.21 (0.86)   | 8.04E-01 | 6042  | 5.24E-01 | 5.00E-01 | 3.22E-01 |
|                            |   | AA   | 0.96  | -2.11 (2.44)   | 3.85E-01 | 2521 | 0.96  | 3.28 (2.11)   | 1.20E-01 | 3469  | 5.43E-01 | 2.05E-01 | 9.41E-02 |
|                            |   | AI   | 0.95  | -1.71 (1.92)   | 3.72E-01 | 2619 | 0.95  | -1.11 (1.48)  | 4.55E-01 | 4080  | 2.56E-01 | 5.08E-01 | 8.04E-01 |
|                            |   | MA/H | 0.88  | 14.04 (5.98)   | 1.90E-02 | 183  | 0.92  | -0.16 (10.60) | 9.88E-01 | 81    | 4.19E-02 | 6.39E-02 | 2.44E-01 |
| rs1501908<br><i>TIMD4</i>  | G | EA   | 0.63  | 1.63 (0.62)    | 9.02E-03 | 6567 | 0.64  | 0.67 (0.48)   | 1.62E-01 | 7546  | 6.87E-03 | 1.24E-02 | 2.25E-01 |
|                            |   | AA   | 0.37  | 1.26 (0.99)    | 2.03E-01 | 3044 | 0.37  | 0.42 (0.68)   | 5.37E-01 | 4158  | 2.18E-01 | 3.67E-01 | 4.86E-01 |
|                            |   | AI   | 0.87  | -3.19 (1.33)   | 1.63E-02 | 2603 | 0.88  | -1.73 (1.06)  | 1.01E-01 | 4053  | 5.43E-03 | 1.45E-02 | 3.91E-01 |
|                            |   | MA/H | 0.76  | 0.82 (1.93)    | 6.72E-01 | 927  | 0.76  | -1.33 (0.88)  | 1.29E-01 | 874   | 2.28E-01 | 2.89E-01 | 3.10E-01 |
| rs2075650<br><i>TOMM40</i> | A | EA   | 0.87  | -5.28 (1.85)   | 4.31E-03 | 1266 | 0.88  | -4.24 (1.65)  | 1.02E-02 | 1763  | 1.35E-04 | 6.25E-04 | 6.76E-01 |
|                            |   | AA   | 0.87  | 0.00 (3.25)    | 9.99E-01 | 570  | 0.86  | -4.81 (3.49)  | 1.68E-01 | 433   | 3.48E-01 | 3.87E-01 | 3.14E-01 |
|                            |   | AI   | --    | --             | --       | --   | --    | --            | --       | --    | --       | --       | --       |
|                            |   | MA/H | 0.90  | -9.57 (6.03)   | 1.12E-01 | 184  | 0.92  | 26.78 (10.15) | 8.36E-03 | 81    | 9.85E-01 | 8.74E-03 | 2.09E-03 |
| rs2954029<br><i>TRIB1</i>  | A | EA   | 0.54  | 1.98 (0.67)    | 3.02E-03 | 5571 | 0.53  | 2.16 (0.49)   | 1.09E-05 | 6520  | 1.16E-07 | 7.59E-07 | 8.29E-01 |
|                            |   | AA   | 0.67  | -0.52 (2.42)   | 8.28E-01 | 524  | 0.68  | -0.96 (1.06)  | 3.69E-01 | 693   | 3.63E-01 | 6.52E-01 | 8.70E-01 |
|                            |   | AI   | --    | --             | --       | --   | --    | --            | --       | --    | --       | --       | --       |
|                            |   | MA/H | 0.61  | 4.15 (1.81)    | 2.20E-02 | 746  | 0.63  | 0.58 (0.80)   | 4.69E-01 | 794   | 1.13E-01 | 5.57E-02 | 7.09E-02 |
| rs471364<br><i>TTC39B</i>  | A | EA   | 0.89  | 1.96 (0.86)    | 2.24E-02 | 7633 | 0.88  | 0.37 (0.66)   | 5.78E-01 | 9178  | 6.62E-02 | 6.32E-02 | 1.43E-01 |
|                            |   | AA   | 0.81  | 0.57 (1.22)    | 6.39E-01 | 2961 | 0.81  | -1.96 (0.85)  | 2.19E-02 | 4035  | 1.07E-01 | 6.47E-02 | 8.94E-02 |
|                            |   | AI   | 0.97  | -5.26 (2.57)   | 4.11E-02 | 2604 | 0.97  | 0.42 (2.05)   | 8.38E-01 | 4065  | 2.66E-01 | 1.22E-01 | 8.45E-02 |
|                            |   | MA/H | 0.92  | 1.50 (2.93)    | 6.09E-01 | 890  | 0.92  | -0.15 (1.44)  | 9.18E-01 | 825   | 8.94E-01 | 8.73E-01 | 6.14E-01 |

\* Abbreviations: RE=race/ethnicity: EA=European American; AA=African American; AI=American Indian; MA/H=Mexican American/Hispanic; CAF = coding allele frequency; SE=standard error.

<sup>†</sup> P-value for SNP-phenotype association in the sex-combined meta-analysis, not allowing for different effects by sex.

<sup>\*</sup> P-value for SNP-phenotype association in the sex-combined meta-analysis, allowing for different effects by sex.

<sup>§</sup> P-value for heterogeneity by sex.

<sup>||</sup> Data not available.

Supplementary Table 4. Sex-specific associations of GWAS-identified lipid SNPs with HDL levels in the PAGE study.

| SNP/Gene                            | Coded Allele | R/E* | Males |              |          |      | Females |              |          |       | P <sub>comb</sub> <sup>†</sup> | P <sub>diff</sub> <sup>‡</sup> | P <sub>het</sub> <sup>§</sup> |
|-------------------------------------|--------------|------|-------|--------------|----------|------|---------|--------------|----------|-------|--------------------------------|--------------------------------|-------------------------------|
|                                     |              |      | CAF   | Beta (SE)    | P        | N    | CAF     | Beta (SE)    | P        | N     |                                |                                |                               |
| rs1883025<br><i>ABCA1</i>           | A            | EA   | 0.24  | -1.00 (0.25) | 7.28E-05 | 6226 | 0.25    | -0.25 (0.24) | 3.00E-01 | 7144  | 5.19E-04                       | 2.22E-04                       | 2.90E-02                      |
|                                     |              | AA   | 0.34  | -0.54 (0.82) | 5.07E-01 | 823  | 0.34    | 0.19 (0.39)  | 6.31E-01 | 1032  | 8.80E-01                       | 7.15E-01                       | 4.21E-01                      |
|                                     |              | AI   | --    | --           | --       | --   | --      | --           | --       | --    | --                             | --                             | --                            |
|                                     |              | MA/H | 0.28  | -0.38 (0.56) | 4.95E-01 | 1148 | 0.26    | -0.19 (0.32) | 5.48E-01 | 1187  | 3.90E-01                       | 6.62E-01                       | 7.66E-01                      |
| rs3890182<br><i>ABCA1</i>           | A            | EA   | 0.12  | -0.98 (0.27) | 3.33E-04 | 8761 | 0.12    | -0.88 (0.25) | 4.20E-04 | 14870 | 5.09E-07                       | 3.14E-06                       | 7.82E-01                      |
|                                     |              | AA   | 0.12  | -0.76 (0.54) | 1.63E-01 | 3348 | 0.12    | -0.73 (0.37) | 4.48E-02 | 6338  | 1.45E-02                       | 5.04E-02                       | 9.74E-01                      |
|                                     |              | AI   | 0.04  | -2.21 (1.09) | 4.26E-02 | 2605 | 0.04    | -0.44 (0.89) | 6.24E-01 | 4194  | 9.67E-02                       | 1.13E-01                       | 2.07E-01                      |
|                                     |              | MA/H | 0.08  | -0.18 (0.90) | 8.45E-01 | 1319 | 0.09    | -0.37 (0.49) | 4.48E-01 | 2021  | 4.48E-01                       | 7.36E-01                       | 8.46E-01                      |
| rs4149268<br><i>ABCA1</i>           | A            | EA   | 0.37  | -0.53 (0.23) | 1.93E-02 | 6214 | 0.37    | -0.01 (0.21) | 9.70E-01 | 6988  | 1.02E-01                       | 6.45E-02                       | 9.38E-02                      |
|                                     |              | AA   | 0.67  | 0.54 (0.49)  | 2.74E-01 | 2230 | 0.68    | -0.29 (0.33) | 3.90E-01 | 2873  | 9.26E-01                       | 3.80E-01                       | 1.65E-01                      |
|                                     |              | AI   | --    | --           | --       | --   | --      | --           | --       | --    | --                             | --                             | --                            |
|                                     |              | MA/H | 0.31  | 0.43 (0.51)  | 4.03E-01 | 1271 | 0.32    | -0.39 (0.30) | 1.93E-01 | 1207  | 4.85E-01                       | 3.02E-01                       | 1.67E-01                      |
| rs6544713<br><i>ABCG8</i>           | T            | EA   | 0.31  | -0.67 (0.24) | 4.98E-03 | 6127 | 0.32    | -0.13 (0.26) | 6.07E-01 | 11515 | 1.55E-02                       | 1.69E-02                       | 1.30E-01                      |
|                                     |              | AA   | 0.17  | 0.32 (0.52)  | 5.45E-01 | 2821 | 0.17    | -0.22 (0.39) | 5.73E-01 | 5744  | 9.29E-01                       | 7.10E-01                       | 4.11E-01                      |
|                                     |              | AI   | 0.09  | -1.29 (0.71) | 7.15E-02 | 2601 | 0.09    | 0.06 (0.60)  | 9.22E-01 | 4188  | 2.76E-01                       | 1.96E-01                       | 1.50E-01                      |
|                                     |              | MA/H | 0.16  | -2.56 (1.51) | 9.05E-02 | 182  | 0.22    | -0.50 (0.88) | 5.71E-01 | 851   | 1.79E-01                       | 2.03E-01                       | 2.40E-01                      |
| rs1748195<br><i>ANGPT3</i>          | C            | EA   | 0.67  | -0.22 (0.24) | 3.58E-01 | 6055 | 0.66    | -0.10 (0.20) | 6.19E-01 | 11538 | 8.34E-01                       | 5.80E-01                       | 3.06E-01                      |
|                                     |              | AA   | 0.34  | 0.44 (0.56)  | 4.31E-01 | 1879 | 0.35    | 0.08 (0.29)  | 7.77E-01 | 4614  | 9.08E-01                       | 7.04E-01                       | 4.07E-01                      |
|                                     |              | AI   | --    | --           | --       | --   | 0.61    | 1.53 (2.12)  | 4.71E-01 | 132   | 4.71E-01                       | --                             | --                            |
|                                     |              | MA/H | 0.60  | 0.48 (0.52)  | 3.55E-01 | 1149 | 0.59    | 0.27 (0.27)  | 3.08E-01 | 1956  | 6.32E-01                       | 3.88E-01                       | 1.97E-01                      |
| rs2967605<br><i>ANGPTL4</i>         | A            | EA   | 0.18  | -0.67 (0.23) | 3.51E-03 | 8757 | 0.18    | -0.80 (0.23) | 3.68E-04 | 10193 | 4.52E-06                       | 2.46E-05                       | 6.83E-01                      |
|                                     |              | AA   | 0.21  | -0.96 (0.44) | 2.89E-02 | 3352 | 0.21    | -0.65 (0.31) | 3.57E-02 | 4520  | 2.93E-03                       | 1.01E-02                       | 5.63E-01                      |
|                                     |              | AI   | 0.30  | -0.06 (0.44) | 8.86E-01 | 2601 | 0.29    | -0.51 (0.35) | 1.46E-01 | 4052  | 2.21E-01                       | 3.44E-01                       | 4.25E-01                      |
|                                     |              | MA/H | 0.22  | -1.08 (0.56) | 5.41E-02 | 1326 | 0.24    | -0.25 (0.32) | 4.35E-01 | 1259  | 1.03E-01                       | 1.15E-01                       | 1.97E-01                      |
| rs28927680<br><i>APOA1/C3/A4/A5</i> | G            | EA   | 0.93  | 1.50 (0.34)  | 9.48E-06 | 9479 | 0.93    | 0.71 (0.32)  | 2.50E-02 | 15704 | 3.10E-06                       | 4.40E-06                       | 8.94E-02                      |
|                                     |              | AA   | 0.84  | -0.24 (0.47) | 6.07E-01 | 3641 | 0.84    | -0.18 (0.32) | 5.69E-01 | 6798  | 4.47E-01                       | 7.45E-01                       | 9.15E-01                      |
|                                     |              | AI   | 0.87  | 1.08 (0.62)  | 8.06E-02 | 2604 | 0.87    | 1.00 (0.43)  | 2.06E-02 | 4195  | 3.75E-03                       | 1.48E-02                       | 9.16E-01                      |
|                                     |              | MA/H | 0.85  | -0.34 (0.67) | 6.17E-01 | 1328 | 0.86    | -0.53 (0.37) | 1.54E-01 | 2038  | 1.36E-01                       | 3.20E-01                       | 8.02E-01                      |
| rs3135506<br><i>APOA5</i>           | C            | EA   | 0.06  | -1.65 (0.37) | 7.70E-06 | 8521 | 0.06    | -1.53 (0.37) | 4.27E-05 | 9925  | 1.38E-09                       | 1.02E-08                       | 8.29E-01                      |
|                                     |              | AA   | 0.06  | -1.82 (0.87) | 3.59E-02 | 2808 | 0.06    | -1.29 (0.59) | 2.74E-02 | 3776  | 2.68E-03                       | 9.69E-03                       | 6.14E-01                      |
|                                     |              | AI   | 0.12  | -1.41 (0.62) | 2.23E-02 | 2613 | 0.13    | -1.09 (0.44) | 1.29E-02 | 4065  | 8.11E-04                       | 3.33E-03                       | 6.68E-01                      |

|                            |   |      |      |              |          |      |      |               |          |       |          |          |          |
|----------------------------|---|------|------|--------------|----------|------|------|---------------|----------|-------|----------|----------|----------|
|                            |   | MA/H | 0.14 | -1.38 (0.70) | 4.80E-02 | 1320 | 0.13 | -0.42 (0.40)  | 3.01E-01 | 1250  | 5.92E-02 | 8.30E-02 | 2.34E-01 |
| rs964184                   | C | EA   | 0.86 | 1.85 (0.39)  | 1.88E-06 | 4180 | 0.86 | 1.71 (0.42)   | 3.78E-05 | 9351  | 3.08E-10 | 2.35E-09 | 8.15E-01 |
| <i>APOA1/C3/A4/A5</i>      |   | AA   | 0.80 | -1.55 (0.89) | 8.22E-02 | 1033 | 0.80 | 0.90 (0.57)   | 1.15E-01 | 3541  | 6.99E-01 | 6.37E-02 | 2.07E-02 |
|                            |   | AI   | --   | --           | --       | --   | 0.78 | 1.32 (2.48)   | 5.96E-01 | 132   | 5.96E-01 | --       | --       |
|                            |   | MA/H | --   | --           | --       | --   | 0.75 | 3.17 (0.89)   | 3.44E-04 | 772   | 3.44E-04 | --       | --       |
| rs562338                   | T | EA   | 0.19 | 0.06 (0.25)  | 8.11E-01 | 6978 | 0.19 | 0.14 (0.28)   | 6.24E-01 | 12803 | 6.13E-01 | 8.62E-01 | 8.39E-01 |
| <i>APOB</i>                |   | AA   | 0.59 | 0.90 (0.41)  | 2.84E-02 | 2524 | 0.59 | 0.46 (0.32)   | 1.42E-01 | 5298  | 1.23E-02 | 3.07E-02 | 4.01E-01 |
|                            |   | AI   | 0.08 | -0.09 (0.72) | 8.99E-01 | 2608 | 0.08 | 0.51 (0.58)   | 3.80E-01 | 4191  | 5.47E-01 | 6.75E-01 | 5.15E-01 |
|                            |   | MA/H | 0.16 | -0.67 (1.61) | 6.76E-01 | 182  | 0.09 | 1.89 (1.03)   | 6.54E-02 | 853   | 1.84E-01 | 1.68E-01 | 1.80E-01 |
| rs693                      | T | EA   | 0.49 | -0.47 (0.20) | 2.01E-02 | 6531 | 0.49 | -0.37 (0.22)  | 9.36E-02 | 12409 | 4.43E-03 | 1.65E-02 | 7.44E-01 |
| <i>APOB</i>                |   | AA   | 0.24 | -0.09 (0.49) | 8.55E-01 | 2460 | 0.23 | -0.74 (0.37)  | 4.32E-02 | 5190  | 8.36E-02 | 1.27E-01 | 2.88E-01 |
|                            |   | AI   | 0.33 | -0.20 (0.43) | 6.35E-01 | 2606 | 0.33 | -0.66 (0.32)  | 3.86E-02 | 4182  | 5.22E-02 | 1.05E-01 | 3.92E-01 |
|                            |   | MA/H | 0.37 | -0.36 (1.26) | 7.75E-01 | 182  | 0.41 | -0.62 (0.86)  | 4.70E-01 | 852   | 4.49E-01 | 7.39E-01 | 8.62E-01 |
| rs754523                   | T | EA   | 0.68 | 0.32 (0.22)  | 1.43E-01 | 6534 | 0.68 | 0.04 (0.27)   | 8.94E-01 | 7766  | 2.25E-01 | 3.40E-01 | 4.07E-01 |
| <i>APOB</i>                |   | AA   | 0.78 | 0.48 (0.50)  | 3.34E-01 | 2454 | 0.79 | -0.07 (0.44)  | 8.74E-01 | 3353  | 6.01E-01 | 6.19E-01 | 4.08E-01 |
|                            |   | AI   | 0.69 | 0.28 (0.44)  | 5.23E-01 | 2604 | 0.68 | 0.57 (0.33)   | 8.99E-02 | 4050  | 8.21E-02 | 1.94E-01 | 6.10E-01 |
|                            |   | MA/H | 0.71 | 2.29 (1.23)  | 6.17E-02 | 180  | 0.69 | 5.67 (2.46)   | 2.11E-02 | 80    | 6.92E-03 | 1.22E-02 | 2.19E-01 |
| rs10402271                 | T | EA   | 0.67 | 0.66 (0.24)  | 6.54E-03 | 5543 | 0.67 | -0.004 (0.29) | 9.89E-01 | 6630  | 3.48E-02 | 2.47E-02 | 8.62E-02 |
| <i>APOE/C1/C4</i>          |   | AA   | 0.84 | 0.65 (0.72)  | 3.64E-01 | 1619 | 0.84 | 0.28 (0.70)   | 6.90E-01 | 2176  | 3.57E-01 | 6.12E-01 | 7.12E-01 |
|                            |   | AI   | --   | --           | --       | --   | --   | --            | --       | --    | --       | --       | --       |
|                            |   | MA/H | 0.61 | 0.64 (1.31)  | 6.28E-01 | 183  | 0.63 | 0.88 (2.27)   | 7.00E-01 | 81    | 5.40E-01 | 8.25E-01 | 9.27E-01 |
| rs4420638                  | A | EA   | 0.82 | 1.25 (0.26)  | 1.72E-06 | 7593 | 0.83 | 0.67 (0.23)   | 3.61E-03 | 13605 | 9.13E-08 | 1.53E-07 | 9.43E-02 |
| <i>APOE/C1/C4</i>          |   | AA   | 0.79 | -1.62 (0.59) | 6.37E-03 | 2150 | 0.80 | -0.59 (0.34)  | 8.57E-02 | 5096  | 4.39E-03 | 5.52E-03 | 1.31E-01 |
|                            |   | AI   | 0.92 | 0.97 (0.72)  | 1.77E-01 | 2611 | 0.92 | 1.35 (0.60)   | 2.39E-02 | 4189  | 9.29E-03 | 3.13E-02 | 6.88E-01 |
|                            |   | MA/H | 0.90 | 1.80 (0.88)  | 4.02E-02 | 1094 | 0.89 | 0.60 (0.45)   | 1.88E-01 | 1898  | 3.48E-02 | 5.12E-02 | 2.23E-01 |
| rs4803750                  | A | EA   | 0.93 | -0.08 (0.46) | 8.64E-01 | 5565 | 0.93 | -1.16 (0.56)  | 3.77E-02 | 6649  | 1.48E-01 | 1.14E-01 | 1.33E-01 |
| <i>BCL3</i>                |   | AA   | 0.92 | -1.47 (1.01) | 1.46E-01 | 1623 | 0.92 | 1.28 (0.93)   | 1.67E-01 | 2193  | 9.73E-01 | 1.34E-01 | 4.50E-02 |
|                            |   | AI   | --   | --           | --       | --   | --   | --            | --       | --    | --       | --       | --       |
|                            |   | MA/H | 0.86 | 1.53 (1.78)  | 3.90E-01 | 183  | 0.84 | -4.86 (3.34)  | 1.45E-01 | 81    | 9.41E-01 | 2.39E-01 | 9.11E-02 |
| rs646776                   | A | EA   | 0.78 | -0.66 (0.25) | 6.98E-03 | 6702 | 0.79 | -0.25 (0.29)  | 3.98E-01 | 7978  | 9.13E-03 | 1.83E-02 | 2.74E-01 |
| <i>CELSR2/PSC R1/SORT1</i> |   | AA   | 0.64 | -0.68 (0.42) | 1.06E-01 | 2750 | 0.65 | -0.24 (0.37)  | 5.05E-01 | 3799  | 1.18E-01 | 2.17E-01 | 4.36E-01 |
|                            |   | AI   | 0.80 | -1.15 (0.70) | 1.02E-01 | 1078 | 0.80 | -0.74 (0.55)  | 1.79E-01 | 1747  | 3.89E-02 | 1.07E-01 | 6.48E-01 |
|                            |   | MA/H | 0.80 | 2.29 (1.57)  | 1.43E-01 | 182  | 0.74 | 0.69 (2.72)   | 7.99E-01 | 80    | 1.63E-01 | 3.31E-01 | 6.09E-01 |
| rs599839                   | A | EA   | 0.77 | -0.68 (0.24) | 4.30E-03 | 6986 | 0.77 | -0.08 (0.28)  | 7.87E-01 | 8150  | 1.84E-02 | 1.63E-02 | 1.02E-01 |
| <i>CELSR2/PSC</i>          |   | AA   | 0.29 | -0.83 (0.45) | 6.29E-02 | 2524 | 0.28 | 0.30 (0.40)   | 4.55E-01 | 3471  | 4.97E-01 | 1.34E-01 | 5.93E-02 |



|                                                  |   |      |      |              |          |      |      |              |          |       |           |           |          |
|--------------------------------------------------|---|------|------|--------------|----------|------|------|--------------|----------|-------|-----------|-----------|----------|
| <i>R1/SORT1</i>                                  |   | AI   | 0.78 | -0.86 (0.47) | 6.82E-02 | 2585 | 0.78 | -0.64 (0.38) | 9.10E-02 | 4043  | 1.39E-02  | 4.54E-02  | 7.21E-01 |
|                                                  |   | MA/H | 0.77 | 1.59 (1.52)  | 2.95E-01 | 178  | 0.72 | -0.33 (2.62) | 9.00E-01 | 81    | 3.99E-01  | 5.73E-01  | 5.26E-01 |
| rs12596776<br><i>CETP</i>                        | C | EA   | 0.90 | -1.22 (0.38) | 1.26E-03 | 6202 | 0.90 | -0.96 (0.34) | 5.35E-03 | 7000  | 2.34E-05  | 1.13E-04  | 6.12E-01 |
|                                                  |   | AA   | 0.94 | 0.61 (0.98)  | 5.35E-01 | 2234 | 0.94 | -1.39 (0.66) | 3.41E-02 | 2859  | 1.57E-01  | 8.74E-02  | 9.03E-02 |
|                                                  |   | AI   | --   | --           | --       | --   | --   | --           | --       | --    | --        | --        | --       |
|                                                  |   | MA/H | 0.94 | 0.43 (0.94)  | 6.50E-01 | 1314 | 0.94 | -0.56 (0.57) | 3.25E-01 | 1265  | 5.45E-01  | 5.56E-01  | 3.69E-01 |
| rs1566439<br><i>CETP</i>                         | A | EA   | 0.60 | -0.65 (0.20) | 1.43E-03 | 7335 | 0.60 | -0.29 (0.19) | 1.22E-01 | 8725  | 9.45E-04  | 1.87E-03  | 2.03E-01 |
|                                                  |   | AA   | 0.78 | 0.59 (0.53)  | 2.66E-01 | 2443 | 0.78 | -0.05 (0.37) | 8.88E-01 | 3223  | 6.02E-01  | 5.34E-01  | 3.22E-01 |
|                                                  |   | AI   | --   | --           | --       | --   | --   | --           | --       | --    | --        | --        | --       |
|                                                  |   | MA/H | 0.54 | -0.83 (0.48) | 8.05E-02 | 1321 | 0.54 | 0.02 (0.27)  | 9.45E-01 | 1267  | 4.16E-01  | 2.16E-01  | 1.21E-01 |
| rs1864163<br><i>CETP</i>                         | A | EA   | 0.24 | -2.57 (1.55) | 9.67E-02 | 182  | 0.21 | -1.16 (2.68) | 6.66E-01 | 109   | 9.80E-02  | 2.29E-01  | 6.49E-01 |
|                                                  |   | AA   | 0.27 | -2.95 (1.11) | 8.13E-03 | 367  | 0.24 | -2.08 (2.55) | 4.15E-01 | 84    | 5.93E-03  | 2.16E-02  | 7.54E-01 |
|                                                  |   | AI   | --   | --           | --       | --   | --   | --           | --       | --    | --        | --        | --       |
|                                                  |   | MA/H | 0.27 | -2.08 (1.32) | 1.15E-01 | 183  | 0.30 | -5.43 (2.71) | 4.48E-02 | 82    | 2.18E-02  | 3.87E-02  | 2.66E-01 |
| rs3764261<br><i>CETP</i>                         | T | EA   | 0.32 | 3.02 (0.19)  | 8.65E-58 | 8926 | 0.33 | 3.20 (0.18)  | 1.16E-68 | 10552 | 1.76E-124 | 3.53E-123 | 4.86E-01 |
|                                                  |   | AA   | 0.31 | 3.11 (0.39)  | 6.85E-16 | 3538 | 0.32 | 1.93 (0.27)  | 1.60E-12 | 4788  | 1.73E-25  | 9.32E-26  | 1.24E-02 |
|                                                  |   | AI   | 0.31 | 2.82 (0.43)  | 5.01E-11 | 2589 | 0.31 | 2.85 (0.33)  | 5.62E-18 | 4036  | 1.88E-27  | 2.38E-26  | 9.49E-01 |
|                                                  |   | MA/H | 0.34 | 2.21 (0.52)  | 2.11E-05 | 1272 | 0.33 | 1.69 (0.29)  | 9.89E-09 | 1207  | 1.39E-12  | 8.33E-12  | 3.86E-01 |
| rs9989419<br><i>CETP</i>                         | A | EA   | 0.40 | -1.83 (0.20) | 8.08E-21 | 7699 | 0.40 | -2.47 (0.23) | 2.23E-26 | 8954  | 1.38E-44  | 2.52E-44  | 3.71E-02 |
|                                                  |   | AA   | 0.60 | 0.55 (0.40)  | 1.68E-01 | 2809 | 0.60 | -0.58 (0.35) | 9.48E-02 | 3902  | 7.22E-01  | 9.59E-02  | 3.27E-02 |
|                                                  |   | AI   | 0.26 | -1.99 (0.45) | 1.02E-05 | 2601 | 0.25 | -1.63 (0.37) | 8.38E-06 | 4049  | 4.40E-10  | 2.82E-09  | 5.34E-01 |
|                                                  |   | MA/H | 0.34 | -1.95 (1.22) | 1.09E-01 | 181  | 0.40 | -4.50 (2.45) | 6.63E-02 | 81    | 2.43E-02  | 5.13E-02  | 3.51E-01 |
| rs16996148<br><i>CILP2/PBX4</i><br><i>/NCAN1</i> | T | EA   | 0.08 | 0.17 (0.32)  | 5.93E-01 | 8720 | 0.08 | -0.09 (0.30) | 7.64E-01 | 14809 | 8.83E-01  | 8.29E-01  | 5.52E-01 |
|                                                  |   | AA   | 0.15 | -0.24 (0.50) | 6.37E-01 | 3325 | 0.15 | -0.50 (0.33) | 1.32E-01 | 6315  | 1.28E-01  | 2.87E-01  | 6.69E-01 |
|                                                  |   | AI   | 0.04 | -1.79 (1.02) | 7.79E-02 | 2610 | 0.04 | -0.80 (0.78) | 3.03E-01 | 4195  | 5.86E-02  | 1.24E-01  | 4.41E-01 |
|                                                  |   | MA/H | 0.06 | 0.54 (1.01)  | 5.93E-01 | 1328 | 0.06 | 0.69 (0.58)  | 2.36E-01 | 2041  | 1.96E-01  | 4.29E-01  | 8.98E-01 |
| rs174547<br><i>FADS1</i>                         | T | EA   | 0.66 | 0.82 (0.22)  | 1.52E-04 | 7140 | 0.66 | 0.60 (0.20)  | 2.86E-03 | 8055  | 1.88E-06  | 8.88E-06  | 4.70E-01 |
|                                                  |   | AA   | 0.81 | 0.99 (0.62)  | 1.09E-01 | 3323 | 0.92 | 0.65 (0.46)  | 1.59E-01 | 4472  | 3.71E-02  | 1.03E-01  | 6.54E-01 |
|                                                  |   | AI   | 0.17 | 0.33 (0.58)  | 5.70E-01 | 2202 | 0.15 | 0.59 (0.52)  | 2.50E-01 | 3492  | 2.17E-01  | 4.40E-01  | 7.30E-01 |
|                                                  |   | MA/H | 0.38 | 0.43 (0.49)  | 3.79E-01 | 1269 | 0.40 | 0.89 (0.28)  | 1.32E-03 | 1211  | 1.25E-03  | 3.90E-03  | 4.12E-01 |
| rs2144300<br><i>GALNT2</i>                       | T | EA   | 0.60 | 0.21 (0.19)  | 2.66E-01 | 8671 | 0.60 | 0.63 (0.17)  | 2.12E-04 | 14688 | 5.04E-04  | 5.62E-04  | 9.10E-02 |
|                                                  |   | AA   | 0.14 | 0.71 (0.52)  | 1.69E-01 | 3337 | 0.16 | 0.10 (0.32)  | 7.54E-01 | 6342  | 3.22E-01  | 3.70E-01  | 3.15E-01 |
|                                                  |   | AI   | 0.54 | 0.59 (0.40)  | 1.38E-01 | 2599 | 0.55 | 0.02 (0.31)  | 9.58E-01 | 4180  | 3.41E-01  | 3.33E-01  | 2.56E-01 |
|                                                  |   | MA/H | 0.57 | -0.15 (0.49) | 7.56E-01 | 1332 | 0.55 | 0.41 (0.26)  | 1.14E-01 | 2039  | 2.10E-01  | 2.72E-01  | 3.10E-01 |
| rs1260326                                        | T | EA   | 0.42 | -0.01 (0.20) | 9.70E-01 | 7312 | 0.42 | 0.19 (0.18)  | 2.85E-01 | 13468 | 4.38E-01  | 5.64E-01  | 4.60E-01 |

|                            |   |      |      |              |          |      |      |              |          |       |          |          |          |
|----------------------------|---|------|------|--------------|----------|------|------|--------------|----------|-------|----------|----------|----------|
| <i>GCKR</i>                |   | AA   | 0.17 | 1.00 (0.92)  | 2.80E-01 | 1019 | 0.15 | 0.56 (0.43)  | 1.89E-01 | 3203  | 9.96E-02 | 2.35E-01 | 6.67E-01 |
|                            |   | AI   | --   | --           | --       | --   | 0.29 | 0.20 (2.04)  | 9.22E-01 | 131   | 9.22E-01 | --       | --       |
|                            |   | MA/H | 0.32 | 0.10 (0.54)  | 8.47E-01 | 1135 | 0.33 | 0.42 (0.28)  | 1.35E-01 | 1942  | 1.58E-01 | 3.22E-01 | 5.98E-01 |
| rs780094<br><i>GCKR</i>    | A | EA   | 0.40 | -0.11 (0.21) | 5.94E-01 | 6537 | 0.40 | -0.02 (0.25) | 9.52E-01 | 7775  | 6.52E-01 | 8.66E-01 | 7.70E-01 |
|                            |   | AA   | 0.19 | -0.06 (0.53) | 9.11E-01 | 2458 | 0.18 | 0.76 (0.48)  | 1.11E-01 | 3359  | 2.67E-01 | 2.80E-01 | 2.51E-01 |
|                            |   | AI   | 0.21 | -0.75 (0.49) | 1.31E-01 | 2607 | 0.20 | -0.02 (0.42) | 9.60E-01 | 4061  | 3.13E-01 | 3.20E-01 | 2.61E-01 |
|                            |   | MA/H | 0.34 | -0.42 (1.38) | 7.58E-01 | 182  | 0.33 | 2.00 (2.67)  | 4.53E-01 | 81    | 9.43E-01 | 7.20E-01 | 4.19E-01 |
| rs12654264<br><i>HMGCR</i> | A | EA   | 0.62 | -0.02 (0.19) | 9.00E-01 | 8756 | 0.62 | -0.21 (0.17) | 2.22E-01 | 14863 | 3.26E-01 | 4.71E-01 | 4.61E-01 |
|                            |   | AA   | 0.67 | -0.24 (0.37) | 5.20E-01 | 3343 | 0.67 | -0.11 (0.26) | 6.59E-01 | 6328  | 4.66E-01 | 7.37E-01 | 7.79E-01 |
|                            |   | AI   | 0.57 | 0.46 (0.42)  | 2.64E-01 | 2603 | 0.59 | -0.01 (0.32) | 9.65E-01 | 4194  | 5.17E-01 | 5.35E-01 | 3.62E-01 |
|                            |   | MA/H | 0.61 | 0.06 (0.51)  | 9.02E-01 | 1319 | 0.62 | 0.38 (0.27)  | 1.58E-01 | 2018  | 1.93E-01 | 3.67E-01 | 5.76E-01 |
| rs2650000<br><i>HNF1A</i>  | T | EA   | 0.35 | 0.29 (0.19)  | 1.34E-01 | 8275 | 0.35 | -0.08 (0.19) | 6.61E-01 | 9796  | 4.66E-01 | 2.95E-01 | 1.67E-01 |
|                            |   | AA   | 0.12 | -0.36 (0.56) | 5.26E-01 | 3271 | 0.12 | 0.75 (0.40)  | 5.75E-02 | 4397  | 2.36E-01 | 1.35E-01 | 1.07E-01 |
|                            |   | AI   | 0.41 | 1.00 (0.40)  | 1.38E-02 | 2603 | 0.41 | 0.12 (0.31)  | 6.93E-01 | 4062  | 6.92E-02 | 4.47E-02 | 8.77E-02 |
|                            |   | MA/H | 0.37 | 0.7 (0.50)   | 1.59E-01 | 1327 | 0.36 | 0.46 (0.29)  | 1.12E-01 | 1260  | 3.75E-02 | 1.05E-01 | 6.78E-01 |
| rs1800961<br><i>HNF4A</i>  | T | EA   | 0.03 | -0.58 (0.53) | 2.80E-01 | 8259 | 0.03 | -1.33 (0.50) | 8.10E-03 | 9790  | 7.63E-03 | 1.67E-02 | 3.02E-01 |
|                            |   | AA   | 0.01 | -7.68 (1.61) | 1.99E-06 | 3267 | 0.01 | 0.60 (1.59)  | 7.05E-01 | 4395  | 2.15E-03 | 1.13E-05 | 2.59E-04 |
|                            |   | AI   | 0.03 | -1.24 (1.09) | 2.56E-01 | 2609 | 0.03 | -2.09 (0.91) | 2.23E-02 | 4064  | 1.31E-02 | 3.84E-02 | 5.51E-01 |
|                            |   | MA/H | 0.04 | -1.76 (1.19) | 1.38E-01 | 1275 | 0.04 | -1.30 (0.73) | 7.43E-02 | 1211  | 2.17E-02 | 6.77E-02 | 7.38E-01 |
| rs2271293<br><i>LCAT</i>   | A | EA   | 0.12 | 1.34 (0.29)  | 3.99E-06 | 8281 | 0.12 | 1.23 (0.26)  | 2.46E-06 | 14455 | 4.49E-11 | 3.52E-10 | 7.81E-01 |
|                            |   | AA   | 0.07 | 1.77 (0.72)  | 1.41E-02 | 3268 | 0.08 | 0.49 (0.45)  | 2.77E-01 | 6224  | 2.64E-02 | 2.72E-02 | 1.31E-01 |
|                            |   | AI   | 0.25 | 1.86 (0.45)  | 3.73E-05 | 2600 | 0.24 | 0.84 (0.36)  | 2.06E-02 | 4192  | 1.15E-05 | 1.38E-05 | 7.76E-02 |
|                            |   | MA/H | 0.12 | 0.97 (0.76)  | 2.00E-01 | 1270 | 0.15 | 0.24 (0.38)  | 5.31E-01 | 1979  | 2.55E-01 | 3.61E-01 | 3.89E-01 |
| rs2228671<br><i>LDLR</i>   | T | EA   | 0.12 | -0.17 (0.45) | 7.10E-01 | 3040 | 0.12 | 0.22 (0.35)  | 5.24E-01 | 3848  | 7.83E-01 | 7.62E-01 | 4.94E-01 |
|                            |   | AA   | 0.04 | 1.06 (1.44)  | 4.60E-01 | 1370 | 0.04 | 1.2 (0.84)   | 1.57E-01 | 1456  | 1.11E-01 | 2.79E-01 | 9.36E-01 |
|                            |   | AI   | --   | --           | --       | --   | --   | --           | --       | --    | --       | --       | --       |
|                            |   | MA/H | 0.08 | 0.48 (0.88)  | 5.90E-01 | 1310 | 0.08 | -0.28 (0.52) | 5.85E-01 | 1257  | 8.43E-01 | 7.45E-01 | 4.59E-01 |
| rs6511720<br><i>LDLR</i>   | T | EA   | 0.12 | -0.01 (0.29) | 9.61E-01 | 7700 | 0.12 | 1.28 (0.32)  | 8.57E-05 | 13621 | 9.90E-03 | 4.42E-04 | 3.04E-03 |
|                            |   | AA   | 0.14 | -0.03 (0.58) | 9.58E-01 | 2814 | 0.13 | -0.06 (0.44) | 8.83E-01 | 5732  | 8.81E-01 | 9.88E-01 | 9.64E-01 |
|                            |   | AI   | 0.05 | -0.05 (0.94) | 9.60E-01 | 2598 | 0.04 | 1.55 (0.76)  | 4.24E-02 | 4191  | 1.22E-01 | 1.27E-01 | 1.88E-01 |
|                            |   | MA/H | 0.10 | -1.27 (1.88) | 5.01E-01 | 182  | 0.09 | 3.58 (1.37)  | 9.24E-03 | 852   | 8.77E-02 | 2.69E-02 | 3.77E-02 |
| rs261332<br><i>LIPC</i>    | A | EA   | 0.20 | 1.77 (0.32)  | 3.91E-08 | 4439 | 0.2  | 1.79 (0.42)  | 2.00E-05 | 4926  | 3.52E-12 | 3.02E-11 | 9.64E-01 |
|                            |   | AA   | 0.24 | 0.25 (0.67)  | 7.08E-01 | 1399 | 0.25 | 0.86 (0.66)  | 1.90E-01 | 1827  | 2.32E-01 | 3.95E-01 | 5.14E-01 |
|                            |   | AI   | --   | --           | --       | --   | --   | --           | --       | --    | --       | --       | --       |
|                            |   | MA/H | 0.20 | -0.15 (1.49) | 9.19E-01 | 179  | 0.16 | 1.03 (3.22)  | 7.49E-01 | 80    | 9.66E-01 | 9.45E-01 | 7.39E-01 |

|                              |   |      |      |              |          |      |      |              |          |       |          |          |          |
|------------------------------|---|------|------|--------------|----------|------|------|--------------|----------|-------|----------|----------|----------|
| rs4775041<br><i>LIPC</i>     | C | EA   | 0.29 | 1.33 (0.20)  | 1.81E-11 | 8733 | 0.29 | 1.05 (0.19)  | 4.53E-08 | 10175 | 7.69E-18 | 4.70E-17 | 3.05E-01 |
|                              |   | AA   | 0.14 | 0.2 (0.53)   | 7.09E-01 | 3344 | 0.13 | 0.81 (0.38)  | 3.26E-02 | 4498  | 5.05E-02 | 9.51E-02 | 3.49E-01 |
|                              |   | AI   | 0.20 | 1.19 (0.48)  | 1.30E-02 | 2610 | 0.21 | 1.42 (0.39)  | 2.36E-04 | 4063  | 9.84E-06 | 5.25E-05 | 7.07E-01 |
|                              |   | MA/H | 0.18 | 1.72 (0.61)  | 4.79E-03 | 1328 | 0.18 | 0.38 (0.35)  | 2.75E-01 | 1258  | 1.85E-02 | 1.03E-02 | 5.78E-02 |
| rs2156552<br><i>LIPG</i>     | T | EA   | 0.17 | -0.38 (0.24) | 1.08E-01 | 8761 | 0.16 | -0.56 (0.24) | 1.80E-02 | 10208 | 4.90E-03 | 1.67E-02 | 6.04E-01 |
|                              |   | AA   | 0.05 | -1.22 (0.93) | 1.90E-01 | 3349 | 0.04 | 0.26 (0.65)  | 6.95E-01 | 4510  | 6.67E-01 | 3.92E-01 | 1.94E-01 |
|                              |   | AI   | 0.04 | -1.40 (0.94) | 1.39E-01 | 2605 | 0.04 | -1.06 (0.93) | 2.57E-01 | 4058  | 6.49E-02 | 1.76E-01 | 8.00E-01 |
|                              |   | MA/H | 0.07 | 0.68 (0.92)  | 4.60E-01 | 1319 | 0.08 | 0.55 (0.48)  | 2.53E-01 | 1256  | 1.75E-01 | 3.96E-01 | 9.05E-01 |
| rs2197089<br><i>LPL</i>      | T | EA   | 0.55 | 0.61 (0.18)  | 6.44E-04 | 8769 | 0.55 | 0.83 (0.17)  | 5.35E-07 | 14869 | 1.99E-09 | 1.01E-08 | 3.76E-01 |
|                              |   | AA   | 0.78 | 0.81 (0.43)  | 5.90E-02 | 3362 | 0.78 | 0.80 (0.29)  | 5.97E-03 | 6351  | 8.55E-04 | 3.83E-03 | 9.88E-01 |
|                              |   | AI   | 0.41 | 1.11 (0.41)  | 7.14E-03 | 2607 | 0.41 | 0.80 (0.31)  | 9.83E-03 | 4192  | 2.34E-04 | 9.53E-04 | 5.50E-01 |
|                              |   | MA/H | 0.46 | 1.39 (0.48)  | 3.54E-03 | 1330 | 0.48 | 0.48 (0.26)  | 6.09E-02 | 2032  | 2.43E-03 | 2.45E-03 | 9.31E-02 |
| rs328<br><i>LPL</i>          | C | EA   | 0.90 | -1.76 (0.31) | 1.47E-08 | 8589 | 0.90 | -1.93 (0.28) | 3.34E-12 | 14628 | 3.04E-19 | 3.01E-18 | 6.84E-01 |
|                              |   | AA   | 0.93 | -1.74 (0.85) | 4.13E-02 | 2794 | 0.93 | -1.19 (0.53) | 2.50E-02 | 5552  | 2.90E-03 | 1.01E-02 | 5.78E-01 |
|                              |   | AI   | 0.97 | -0.49 (1.21) | 6.89E-01 | 2610 | 0.97 | -1.71 (1.08) | 1.14E-01 | 4200  | 1.49E-01 | 2.65E-01 | 4.52E-01 |
|                              |   | MA/H | 0.94 | -2.55 (1.00) | 1.09E-02 | 1321 | 0.93 | -1.07 (0.54) | 4.85E-02 | 2022  | 3.20E-03 | 5.58E-03 | 1.95E-01 |
| rs6586891<br><i>LPL</i>      | A | EA   | 0.65 | 0.99 (0.21)  | 2.27E-06 | 7001 | 0.65 | 0.90 (0.23)  | 9.82E-05 | 12798 | 9.45E-10 | 6.94E-09 | 7.80E-01 |
|                              |   | AA   | 0.84 | 0.60 (0.56)  | 2.77E-01 | 2522 | 0.84 | 0.30 (0.41)  | 4.75E-01 | 5319  | 2.22E-01 | 4.29E-01 | 6.56E-01 |
|                              |   | AI   | 0.45 | 0.55 (0.41)  | 1.72E-01 | 2597 | 0.45 | 0.49 (0.31)  | 1.11E-01 | 4185  | 3.61E-02 | 1.10E-01 | 9.04E-01 |
|                              |   | MA/H | 0.55 | -0.76 (1.17) | 5.15E-01 | 183  | 0.58 | 1.48 (0.81)  | 6.63E-02 | 852   | 2.53E-01 | 1.50E-01 | 1.15E-01 |
| rs6102059<br><i>MAFB</i>     | T | EA   | 0.30 | 0.08 (0.29)  | 7.84E-01 | 4442 | 0.30 | -0.05 (0.37) | 8.88E-01 | 4951  | 8.97E-01 | 9.54E-01 | 7.80E-01 |
|                              |   | AA   | 0.41 | 1.24 (0.61)  | 4.07E-02 | 1412 | 0.42 | -0.14 (0.58) | 8.07E-01 | 1832  | 2.16E-01 | 1.20E-01 | 9.92E-02 |
|                              |   | AI   | --   | --           | --       | --   | --   | --           | --       | --    | --       | --       | --       |
|                              |   | MA/H | 0.26 | 1.81 (1.46)  | 2.15E-01 | 182  | 0.30 | -2.30 (2.61) | 3.78E-01 | 80    | 5.15E-01 | 3.15E-01 | 1.69E-01 |
| rs17145738<br><i>MLXIPL</i>  | T | EA   | 0.12 | 0.81 (0.28)  | 3.50E-03 | 8777 | 0.12 | 0.91 (0.26)  | 3.64E-04 | 14877 | 4.25E-06 | 2.42E-05 | 7.79E-01 |
|                              |   | AA   | 0.09 | -0.53 (0.63) | 3.99E-01 | 3361 | 0.09 | -0.03 (0.42) | 9.52E-01 | 6344  | 6.05E-01 | 7.00E-01 | 5.04E-01 |
|                              |   | AI   | 0.07 | 0.58 (0.77)  | 4.55E-01 | 2607 | 0.07 | 0.19 (0.59)  | 7.43E-01 | 4186  | 4.76E-01 | 7.17E-01 | 6.91E-01 |
|                              |   | MA/H | 0.08 | 0.39 (0.91)  | 6.68E-01 | 1332 | 0.07 | 0.18 (0.52)  | 7.26E-01 | 2037  | 6.05E-01 | 8.58E-01 | 8.45E-01 |
| rs2338104<br><i>MMAB-MVK</i> | C | EA   | 0.46 | -0.34 (0.18) | 5.58E-02 | 8767 | 0.46 | -0.43 (0.18) | 1.52E-02 | 10213 | 2.15E-03 | 8.44E-03 | 7.22E-01 |
|                              |   | AA   | 0.28 | -0.67 (0.40) | 9.38E-02 | 3349 | 0.26 | -0.16 (0.29) | 5.76E-01 | 4512  | 1.49E-01 | 2.10E-01 | 3.08E-01 |
|                              |   | AI   | 0.57 | -0.46 (0.40) | 2.55E-01 | 2590 | 0.58 | 0.23 (0.32)  | 4.69E-01 | 4022  | 8.89E-01 | 4.02E-01 | 1.80E-01 |
|                              |   | MA/H | 0.53 | -0.74 (0.47) | 1.18E-01 | 1327 | 0.52 | -0.44 (0.29) | 1.28E-01 | 1265  | 3.45E-02 | 9.25E-02 | 5.89E-01 |
| rs11206510<br><i>PCSK9</i>   | T | EA   | 0.81 | 0.27 (0.23)  | 2.37E-01 | 8776 | 0.81 | 0.02 (0.21)  | 9.21E-01 | 14877 | 3.85E-01 | 4.94E-01 | 4.18E-01 |
|                              |   | AA   | 0.86 | -0.02 (0.52) | 9.70E-01 | 3355 | 0.86 | -0.53 (0.35) | 1.31E-01 | 6355  | 2.02E-01 | 3.19E-01 | 4.19E-01 |
|                              |   | AI   | 0.94 | 0.21 (0.87)  | 8.05E-01 | 2610 | 0.94 | -1.51 (0.73) | 3.82E-02 | 4196  | 1.54E-01 | 1.13E-01 | 1.27E-01 |

|            |   |      |      |              |          |      |      |              |          |       |          |          |          |
|------------|---|------|------|--------------|----------|------|------|--------------|----------|-------|----------|----------|----------|
|            |   | MA/H | 0.90 | 0.54 (0.77)  | 4.84E-01 | 1332 | 0.87 | 0.54 (0.38)  | 1.59E-01 | 2037  | 1.16E-01 | 2.90E-01 | 9.96E-01 |
| rs11591147 | T | EA   | 0.01 | 0.42 (0.73)  | 5.62E-01 | 9252 | 0.02 | 0.18 (0.71)  | 8.00E-01 | 15503 | 5.58E-01 | 8.18E-01 | 8.10E-01 |
|            |   | AA   | <0.0 | 1.59 (3.81)  | 6.77E-01 | 2978 | <0.0 | 2.38 (2.07)  | 2.52E-01 | 6678  | 2.28E-01 | 4.76E-01 | 8.56E-01 |
|            |   | 1    |      |              |          |      | 1    |              |          |       |          |          |          |
|            |   | AI   | 0.01 | -0.56 (3.55) | 8.75E-01 | 1061 | 0.01 | 4.18 (2.38)  | 7.87E-02 | 2318  | 1.70E-01 | 2.11E-01 | 2.67E-01 |
|            |   | MA/H | <0.0 | 4.11 (3.93)  | 2.96E-01 | 1143 | 0.01 | -2.09 (1.66) | 2.07E-01 | 1942  | 4.50E-01 | 2.62E-01 | 1.46E-01 |
|            |   | 1    |      |              |          |      |      |              |          |       |          |          |          |
| rs7679     | T | EA   | 0.82 | 0.10 (0.30)  | 7.29E-01 | 5439 | 0.82 | 1.68 (0.37)  | 6.27E-06 | 6089  | 1.87E-03 | 3.45E-05 | 9.85E-04 |
|            |   | AA   | 0.96 | 0.79 (0.93)  | 3.96E-01 | 2531 | 0.96 | 0.63 (0.88)  | 4.76E-01 | 3481  | 2.71E-01 | 5.41E-01 | 8.99E-01 |
|            |   | AI   | 0.95 | 0.63 (0.84)  | 4.56E-01 | 2609 | 0.95 | 0.19 (0.73)  | 7.89E-01 | 4057  | 4.91E-01 | 7.31E-01 | 6.97E-01 |
|            |   | MA/H | 0.88 | 1.31 (1.94)  | 4.98E-01 | 184  | 0.92 | 1.21 (4.09)  | 7.67E-01 | 83    | 4.60E-01 | 7.61E-01 | 9.82E-01 |
| rs1501908  | G | EA   | 0.63 | 0.09 (0.21)  | 6.69E-01 | 7211 | 0.63 | -0.03 (0.20) | 8.83E-01 | 8160  | 8.53E-01 | 9.03E-01 | 6.80E-01 |
|            |   | AA   | 0.37 | 0.24 (0.38)  | 5.24E-01 | 3352 | 0.37 | 0.07 (0.26)  | 7.96E-01 | 4508  | 5.65E-01 | 7.90E-01 | 7.07E-01 |
|            |   | AI   | 0.87 | 0.28 (0.58)  | 6.32E-01 | 2593 | 0.88 | 0.16 (0.51)  | 7.57E-01 | 4030  | 5.84E-01 | 8.50E-01 | 8.77E-01 |
|            |   | MA/H | 0.77 | 0.03 (0.57)  | 9.58E-01 | 1327 | 0.76 | -0.21 (0.31) | 5.03E-01 | 1269  | 5.75E-01 | 7.98E-01 | 7.10E-01 |
| rs2075650  | A | EA   | 0.87 | -0.05 (0.72) | 9.46E-01 | 1282 | 0.88 | 0.64 (0.76)  | 3.99E-01 | 1796  | 5.96E-01 | 6.99E-01 | 5.10E-01 |
|            |   | AA   | 0.87 | 0.86 (1.16)  | 4.61E-01 | 570  | 0.86 | 0.61 (1.48)  | 6.78E-01 | 433   | 4.03E-01 | 6.99E-01 | 8.97E-01 |
|            |   | AI   | --   | --           | --       | --   | --   | --           | --       | --    | --       | --       | --       |
|            |   | MA/H | 0.9  | 0.01 (1.93)  | 9.94E-01 | 185  | 0.92 | -0.97 (4.00) | 8.08E-01 | 83    | 9.21E-01 | 9.71E-01 | 8.24E-01 |
| rs2954029  | A | EA   | 0.54 | -0.27 (0.22) | 2.22E-01 | 6227 | 0.53 | -0.62 (0.20) | 1.87E-03 | 7142  | 1.76E-03 | 3.75E-03 | 2.41E-01 |
|            |   | AA   | 0.67 | 0.72 (0.80)  | 3.68E-01 | 824  | 0.68 | -0.44 (0.39) | 2.65E-01 | 1036  | 5.49E-01 | 3.59E-01 | 1.93E-01 |
|            |   | AI   | --   | --           | --       | --   | --   | --           | --       | --    | --       | --       | --       |
|            |   | MA/H | 0.61 | -0.06 (0.53) | 9.17E-01 | 1145 | 0.63 | 0.01 (0.28)  | 9.72E-01 | 1187  | 9.86E-01 | 9.94E-01 | 9.13E-01 |
| rs471364   | A | EA   | 0.89 | 0.86 (0.29)  | 2.88E-03 | 8282 | 0.88 | -0.23 (0.28) | 4.15E-01 | 9809  | 1.41E-01 | 8.42E-03 | 6.58E-03 |
|            |   | AA   | 0.81 | 0.09 (0.47)  | 8.50E-01 | 3268 | 0.81 | 0.34 (0.34)  | 3.09E-01 | 4391  | 3.49E-01 | 5.86E-01 | 6.60E-01 |
|            |   | AI   | 0.97 | 3.19 (1.13)  | 4.62E-03 | 2594 | 0.97 | -1.19 (0.99) | 2.30E-01 | 4042  | 3.33E-01 | 8.79E-03 | 3.50E-03 |
|            |   | MA/H | 0.92 | 0.15 (0.90)  | 8.65E-01 | 1277 | 0.92 | -0.04 (0.51) | 9.41E-01 | 1210  | 9.85E-01 | 9.83E-01 | 8.54E-01 |

\* Abbreviations: RE=race/ethnicity: EA=European American; AA=African American; AI=American Indian; MA/H=Mexican American/Hispanic; CAF = coding allele frequency; SE=standard error.

<sup>†</sup> P-value for SNP-phenotype association in the sex-combined meta-analysis, not allowing for different effects by sex.

<sup>‡</sup> P-value for SNP-phenotype association in the sex-combined meta-analysis, allowing for different effects by sex.

<sup>§</sup> P-value for heterogeneity by sex.

<sup>||</sup> Data not available.

Supplementary Figure 1. Sample sizes required to detect interaction for SNPs with varying minor allele frequencies and effect sizes.

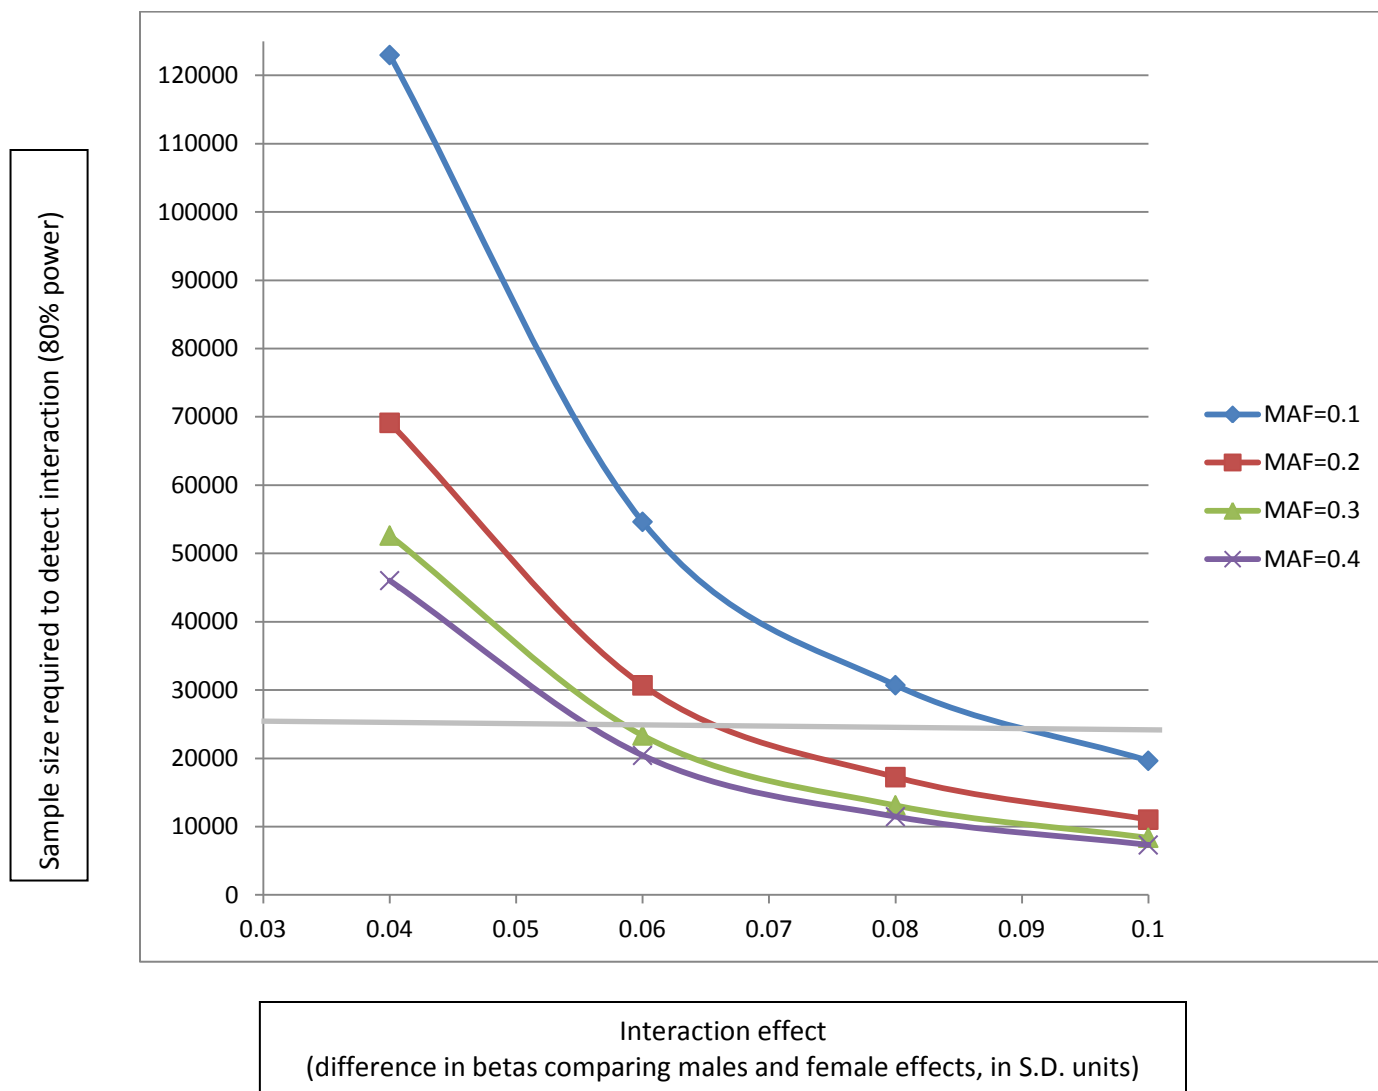

Supplement: 1471-2156-14-33-S1.pdf [file 1471-2156-14-33-S1.pdf]
